# Supplementary material for: What is the NCD service capacity and disruptions due to COVID-19? Results from the WHO non-communicable disease country capacity survey in the Americas region
Source: PubMed Central journal article supplement — BMJ Open. 2023 Mar 2;13(3):e070085. doi: 10.1136/bmjopen-2022-070085 (PMC9990165; doi:10.1136/bmjopen-2022-070085), 2023-03-02
Supplement: bmjopen-2022-070085.draft_revisions.pdf [file bmjopen-2022-070085.draft_revisions.pdf]

# BMJ Open

BMJ Open is committed to open peer review. As part of this commitment we make the peer review history of every article we publish publicly available.

When an article is published we post the peer reviewers' comments and the authors' responses online. We also post the versions of the paper that were used during peer review. These are the versions that the peer review comments apply to.

The versions of the paper that follow are the versions that were submitted during the peer review process. They are not the versions of record or the final published versions. They should not be cited or distributed as the published version of this manuscript.

BMJ Open is an open access journal and the full, final, typeset and author-corrected version of record of the manuscript is available on our site with no access controls, subscription charges or pay-per-view fees (<http://bmjopen.bmj.com>).

If you have any questions on BMJ Open's open peer review process please email [info.bmjopen@bmj.com](mailto:info.bmjopen@bmj.com)

# BMJ Open

## **NCD Service Capacity and Disruptions due to COVID-19 According to a Country Capacity Analysis in the Americas Region**

|                               |                                                                                                                                                                                                                                                                  |
|-------------------------------|------------------------------------------------------------------------------------------------------------------------------------------------------------------------------------------------------------------------------------------------------------------|
| Journal:                      | <i>BMJ Open</i>                                                                                                                                                                                                                                                  |
| Manuscript ID                 | bmjopen-2022-070085                                                                                                                                                                                                                                              |
| Article Type:                 | Original research                                                                                                                                                                                                                                                |
| Date Submitted by the Author: | 21-Nov-2022                                                                                                                                                                                                                                                      |
| Complete List of Authors:     | Luciani, Silvana; Pan American Health Organization, Caixeta, Roberta ; Pan American Health Organization Chavez, Carolina; Pan American Health Organization Ondarsuhu, Dolores; Pan American Health Organization Hennis, Anselm; Pan American Health Organization |
| Keywords:                     | COVID-19, PUBLIC HEALTH, Organisation of health services < HEALTH SERVICES ADMINISTRATION & MANAGEMENT                                                                                                                                                           |
|                               |                                                                                                                                                                                                                                                                  |

SCHOLARONE™  
Manuscripts

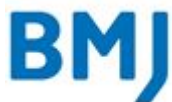

I, the Submitting Author has the right to grant and does grant on behalf of all authors of the Work (as defined in the below author licence), an exclusive licence and/or a non-exclusive licence for contributions from authors who are: i) UK Crown employees; ii) where BMJ has agreed a CC-BY licence shall apply, and/or iii) in accordance with the terms applicable for US Federal Government officers or employees acting as part of their official duties; on a worldwide, perpetual, irrevocable, royalty-free basis to BMJ Publishing Group Ltd ("BMJ") its licensees and where the relevant Journal is co-owned by BMJ to the co-owners of the Journal, to publish the Work in this journal and any other BMJ products and to exploit all rights, as set out in our [licence](#).

The Submitting Author accepts and understands that any supply made under these terms is made by BMJ to the Submitting Author unless you are acting as an employee on behalf of your employer or a postgraduate student of an affiliated institution which is paying any applicable article publishing charge ("APC") for Open Access articles. Where the Submitting Author wishes to make the Work available on an Open Access basis (and intends to pay the relevant APC), the terms of reuse of such Open Access shall be governed by a Creative Commons licence – details of these licences and which [Creative Commons](#) licence will apply to this Work are set out in our licence referred to above.

Other than as permitted in any relevant BMJ Author's Self Archiving Policies, I confirm this Work has not been accepted for publication elsewhere, is not being considered for publication elsewhere and does not duplicate material already published. I confirm all authors consent to publication of this Work and authorise the granting of this licence.

1  
2  
3 **NCD Service Capacity and Disruptions due to COVID-19**  
4 **According to a Country Capacity Analysis in the Americas Region**  
5  
6

7 Silvana Luciani<sup>1</sup>, Roberta Caixeta<sup>1</sup>, Carolina Chavez<sup>1</sup>, Dolores Ondarsuhu<sup>1</sup>, Anselm Hennis<sup>1</sup>  
8  
9

10 <sup>1</sup>Department of Noncommunicable Diseases and Mental Health  
11 Pan American Health Organization  
12 525 23<sup>RD</sup> St NW  
13 Washington, DC, USA  
14  
15

16  
17  
18  
19 Corresponding author:  
20 Silvana Luciani  
21 [lucianis@paho.org](mailto:lucianis@paho.org)  
22  
23  
24  
25

26 **keywords:** public health, hypertension, diabetes, cancer, COVID-19  
27  
28

29 **wordcount:** 2,941  
30  
31  
32  
33  
34  
35  
36  
37  
38  
39  
40  
41  
42  
43  
44  
45  
46  
47  
48  
49  
50  
51  
52  
53  
54  
55  
56  
57  
58  
59  
60

## ABSTRACT

**Objective:** This article presents the Americas regional results of a World Health Organization NCD Country Capacity Survey from 2019-2021, on NCD service capacity and NCD service disruptions from the COVID-19 pandemic.

**Setting:** Information on public sector primary care services for NCDs, and related technical inputs from 35 countries in the Americas region are provided.

**Participants:** All Ministry of Health officials managing a national NCD program, from a WHO Member State in the Americas region, were included throughout this study. Government health officials from countries that are not WHO Member States were excluded.

**Outcome measures:** The availability of evidence based NCD guidelines, essential NCD medicines and basic technologies in primary care, cardiovascular disease risk stratification, cancer screening and palliative care services were measured in 2019, 2020 and 2021. NCD service interruptions, reassignments of NCD staff during the COVID-19 pandemic and mitigation strategies to reduce disruptions for NCD services were measured in 2020 and 2021.

**Results:** More than 50% of countries reporting a lack of comprehensive package of NCD guidelines, essential medicines, and related service inputs. Extensive disruptions in NCD services resulted from the pandemic, with only 12/35 countries (34%), reporting that outpatient NCD services were functioning normally. Ministry of Health staff were largely redirected to work on the COVID-19 response, either full-time or partially, reducing the human resources available for NCD services. Six of 24 countries (25%) reported stock out of essential NCD medicines and/or diagnostics at health facilities which affected service continuity. Mitigation strategies to ensure continuity of care for people with NCDs were deployed in many countries and included triaging patients, telemedicine and tele-consultations, and electronic prescriptions and other novel prescribing practices.

**Conclusions:** The findings from this regional survey suggest significant and sustained disruptions, affecting all countries regardless of the country's level of investments in health care or NCD burden.

**Strengths and limitations of this study:**

- This is the only region-wide analysis in the Americas, with data from 2019-2021, that has systematically measured the NCD service capacity, disruptions of NCD services due to the COVID-19 pandemic, as well as the mitigation strategies used to ensure continuity of services across 35 countries.
- It is based on validated government information from a global standardized methodology, applied by the World Health Organization since 2001 to monitor country capacity for NCD policies and services.
- The main limitation is that this study did not provide the specificity of information by health center level of NCD service capacity and disruptions during the COVID-19 pandemic. In addition, it did not provide information on the impact of these disruptions on people's health outcomes.

## INTRODUCTION

People with noncommunicable diseases require timely diagnosis, continuous treatment and access to essential medicines, as well as ongoing monitoring of their conditions to prevent complications and premature death. Yet health systems in most low- and middle-income countries are not adequately equipped to meet the growing NCD health demands, which has led to global calls for universal health coverage and strengthening primary care services to improve NCD prevention and control.[1,2] The World Health Organization has established, and routinely monitors, targets to strengthen the health system response to NCDs, that cover NCD guidelines and access to essential medicines and technologies, for the four main NCDs (cardiovascular diseases, cancer, diabetes and chronic respiratory diseases), in addition to NCD risk factor targets.[3] To strengthen NCD services, the focus has been on increasing the use of evidence-based national guidelines/protocols/standards for the management of the four main NCDs through a primary care approach in the public sector; as well as provision of drug therapy, including glycaemic control, and counselling for eligible persons at high risk to prevent heart attacks and strokes, with emphasis on the primary care level. These interventions are based on a cost effectiveness analysis, that, together with risk factor reduction interventions, are expected to reduce premature NCD mortality.[4]

In the Americas region, where an estimated 240 million people are living with a chronic condition [5] health systems strengthening for NCDs has been a focus for PAHO Member States since the adoption of a regional NCD plan of action by the Ministries of Health in 2013.[6] Progress has been gradual and an assessment of the NCD plan of action, in 2020, noted that 17/35 countries (48.5%) had implemented a model of integrated management for NCDs, such as a chronic care model with evidence based guidelines, a clinical information system, self-care, community support, and multidisciplinary team-based care.[7] However, the COVID-19 pandemic subsequently has had a significant adverse impact on the Region, including a marked disruption of NCD services.

COVID-19 has been diagnosed in over 153 million people and led to more than 2.7 million deaths in the Region of the Americas, by the end of April 2022.[8] The importance of NCDs as factors leading to severe COVID-19 related illness or death is now well-documented, highlighting the importance of optimal NCD management.[9,10] However, the pandemic has negatively impacted NCD management, related to the extensive primary care disruptions. Two years into the pandemic, 93% (25/27 countries) of countries in the Americas have reported disruptions in their essential health services along the 66 tracer services in health systems.[11]

1  
2  
3 So to what extent have these health system disruptions affected NCD services? This article  
4 presents information on NCD service capacity and disruptions due to the COVID-19 pandemic,  
5 from the perspective of the health authorities responsible for the national NCD programs and  
6 services across the Region of the Americas.  
7  
8

## 9 10 **METHODS**

11  
12  
13 Information on NCD services and disruptions resulting from the COVID-19 pandemic was  
14 extracted from the World Health Organization dataset on the NCD Country Capacity Surveys  
15 (CCS) 2019-2021, from the 35 Member States of the Pan American Health Organization (list of  
16 countries and selected characteristics provided in Appendix 1 in supplemental information). The  
17 CCS is a standardized global methodology that collects information on, among other topics,  
18 NCD services (module 4), and on NCD service disruptions (module 5). An NCD service was  
19 described as health care encompassing front-line health service delivery (primary care) or higher-  
20 level services for any of the main NCDs.  
21  
22  
23  
24  
25

26 Responses to the CCS were provided by the official Ministry of Health authorities responsible  
27 for the national NCD program, and submitted directly, using their unique access to the WHO  
28 CCS on-line tool. Data were then validated by PAHO/WHO, and in the event of any  
29 discrepancies or unanswered questions, feedback was sought from the designated Ministry of  
30 Health official.  
31  
32  
33

34  
35 The CCS was administered in March to June 2019; and from May to June 2020 module 5 was  
36 administered, with a response rate of 83% (29/35 countries). In 2021, the CCS was administered  
37 again from May to September 2021, with a 100% (35/35 countries) response rate.  
38  
39

40 Results presented are from all 35 countries from CCS 2021, and they are presented as a regional  
41 evaluation showing number and proportion of countries, without identifying countries, due to  
42 confidentiality agreements. A comparison of the impact of COVID-19 on NCD services in both  
43 years are presented, in which case data from the same 29 countries that responded to module 5 in  
44 both rounds (2020 and 2021) are presented.  
45  
46  
47  
48

### 49 ***Patient and Public Involvement***

50  
51 There is no patient involvement in this analysis.  
52  
53  
54  
55  
56  
57



## RESULTS

### *Overall limited NCD service capacity in primary care*

For NCD service capacity, the CCS assesses the availability of evidence-based guidelines, essential medicines and technologies in primary care, cardiovascular disease risk stratification in clinical practice, and cancer screening and palliative care. Overall, NCD service capacity is rather limited in the Americas. Evidence-based national guidelines/protocols/standards for the four principal NCDs are available in only 63% (22/35) of countries, a slight improvement from 54% (19/35) in 2019. The most frequently available guidelines utilized in at least 50% of public health-care facilities were on diabetes (74%), hypertension (69%), cancer (60%) and chronic respiratory diseases (51%) (Appendix 2 in supplemental information). Only 29% of countries (10/35) offered cardiovascular risk stratification in clinical practice for the management of patients at high risk for heart attack and stroke in half or more of the primary health care facilities in the public sector.

Essential technologies for cardiovascular diseases (blood pressure measurement devices, total cholesterol measurement, and urine strips for albumin assay) are available in at least half of the health care facilities of the public health sector in 51% (18/35) of countries; and only 34% (12/35) of countries reported having all technologies available for diabetes (blood glucose measurement, oral glucose test, HbA1c test, dilated fundus examination, foot vibration perception by tuning fork, and urine strips for glucose and ketone measurement). This situation has not changed since 2019 (Table 1).

Essential medicines for cardiovascular diseases (aspirin, thiazide diuretics, ACE inhibitors, angiotensin II receptor blockers (ARBs) calcium channel blockers, beta blockers, and statins) were generally available in pharmacies in all almost all countries, with the exception of ARBs which are available in only 74% of countries (26/35). For diabetes, the essential medicines (insulin, metformin, sulphonylureas) are reported as being generally available in almost all countries and this situation has not changed since 2019. Regarding chronic respiratory diseases, steroid inhalers and bronchodilators are available in 77% (27/35) and 89% (31/35) of countries, respectively. Nicotine replacement therapy for smoking cessation remains very limited in the region, with only 23% (8/35) of countries reporting availability. Oral morphine was also identified as an essential medicine which was not widely available in pharmacies, with around half of the countries (51%, 18/35 countries) reporting its availability (Table 1).

**Table 1:** Proportion of countries (%) with available basic NCD technologies and essential medicines in primary care facilities of the public health sector, Americas Region 2019-2021

|                                                 | Countries (%) |      |
|-------------------------------------------------|---------------|------|
|                                                 | 2019          | 2021 |
| <b>All basic NCD technologies*</b>              | 5             | 4    |
| Measuring weight                                | 100           | 97   |
| Measuring height                                | 100           | 100  |
| Blood glucose measurement                       | 94            | 94   |
| Oral glucose tolerance test                     | 63            | 69   |
| HbA1c test                                      | 51            | 54   |
| Dilated fundus examination                      | 37            | 51   |
| Foot vibration perception by tuning fork        | 43            | 51   |
| Urine strips for glucose and ketone measurement | 63            | 57   |
| Blood pressure measurement                      | 97            | 94   |
| Total cholesterol measurement                   | 77            | 71   |
| Urine strips for albumin assay                  | 60            | 54   |
| Peak flow measurement spirometry                | 31            | 17   |
| <b>All essential NCD medicines**</b>            | 17            | 20   |
| Insulin                                         | 83            | 91   |
| Aspirin (75/100 mg)                             | 94            | 91   |
| Metformin                                       | 94            | 100  |
| Thiazide diuretics                              | 91            | 89   |
| ACE inhibitors                                  | 91            | 89   |
| Angiotensin II receptor blockers (ARBs)         | 77            | 74   |
| Calcium channel blockers                        | 89            | 89   |
| Beta blockers                                   | 86            | 91   |
| Statins                                         | 83            | 86   |
| Oral morphine                                   | 49            | 51   |
| Steroid inhaler                                 | 77            | 77   |
| Bronchodilator                                  | 91            | 89   |
| Sulphonylurea(s)                                | 91            | 97   |
| Benzathine penicillin injection                 | 89            | 89   |
| Nicotin Replacement Therapy                     | 23            | 23   |

Range distribution of countries (%)

- <25
- 25-49
- 50-74
- 75-99
- 100

Source: WHO NCD Country Capacity Survey, 2019-2021

Notes: \*Available in 50 or more of the public health care facilities. \*\* Available in 50 or more pharmacies.

Cancer screening is offered in primary care in many countries in the Americas, with 63% (22/35 countries) reporting breast cancer screening; 83% (29/35) reporting cervical cancer screening; and 43% (15/35) of countries reporting colorectal cancer screening. Overall, only 43% of the countries (15/35) reported having a screening program for all three cancer types, and this situation had improved somewhat since 2019. Palliative care services to provide supportive and end-of-life care for people with cancer and other chronic conditions are offered in primary

health care facilities in only 37% of countries (13/35) or community and home-based care in 46% of countries (16/35) and is yet another NCD service that requires strengthening.

### ***NCD service disruptions due to the Covid-19 pandemic***

NCD services were identified as part of the government's core set of essential health services to be maintained during the pandemic in 21 of 26 countries (81%). Nine countries (26%) reported allocating additional funding to NCDs in the government budget for the COVID-19 response (Table 2). Despite this, only 12/35 countries (34%) reported that outpatient NCD services were functioning normally and only 11% of countries (4/35) reported that no activities for NCDs had been postponed due to the pandemic (Figure 1). In 2021, three more countries reported that NCD outpatient services were functioning normally compared to 2020; while 3 fewer countries reported that NCD inpatient services were functioning normally (Appendix 3 in supplementary information).

Ministry of Health staff designated to work on NCD services were largely redirected to work on the COVID-19 response, either full- or part-time, reducing the human resources available to provide care for people with NCDs. Only 2 countries (6%, 2/35 countries) reported that no NCD staff had been redirected to support the COVID-19 effort. By 2021, this situation had worsened, with 14 countries reporting NCD staff were re-assigned to the pandemic, up from 11 countries in 2020 (Table 2).

**Table 2:** NCD service disruptions during the COVID-19 pandemic, Americas Region, 2020-2021

|                                                             | Countries (%) | Comparison of countries (%)<br>in 2020 and in 2021 |                          |
|-------------------------------------------------------------|---------------|----------------------------------------------------|--------------------------|
|                                                             |               | 2021<br>(n=35 countries)                           | 2020<br>(n=29 countries) |
| <b>Redirected NCD resources</b>                             |               |                                                    |                          |
| Staff reassigned/deployed to COVID-19 response              |               |                                                    |                          |
| Some staff partially reassigned                             | 40 (14/35)    | 38 (11/29)                                         | 48 (14/29)               |
| Some staff fully reassigned                                 | 26 (9/35)     | 21 (6/29)                                          | 31 (9/29)                |
| All staff partially reassigned                              | 20 (7/35)     | 31 (9/29)                                          | 28 (8/29)                |
| All staff fully reassigned                                  | 6 (2/35)      | 7 (2/29)                                           | 7 (2/29)                 |
| No staff reassigned                                         | 6 (2/35)      | 3 (1/29)                                           | 7 (2/29)                 |
| Don't know                                                  | 3 (1/35)      | 0 (0/29)                                           | 3 (1/29)                 |
| Government NCD funds allocated to support COVID-19 response |               |                                                    |                          |
| None or not yet                                             | 29 (10/35)    | 59 (17/29)                                         | 31 (9/29)                |
| Don't know                                                  | 49 (17/35)    | 34 (10/29)                                         | 48 (14/29)               |
| 1-25%                                                       | 14 (5/35)     | 0 (0/29)                                           | 10 (3/29)                |
| 26-50%                                                      | 3 (1/35)      | 0 (0/29)                                           | 3 (1/29)                 |
| 51-75%                                                      | 6 (2/35)      | 3 (1/29)                                           | 7 (2/29)                 |
| 76-100%                                                     | 0 (0/35)      | 3 (1/29)                                           | 0 (0/29)                 |
| <b>NCD services included in COVID-19 response</b>           |               |                                                    |                          |

**Table 2:** NCD service disruptions during the COVID-19 pandemic, Americas Region, 2020-2021

|                                                                                             | Countries (%)            | Comparison of countries (%)<br>in 2020 and in 2021 |                          |
|---------------------------------------------------------------------------------------------|--------------------------|----------------------------------------------------|--------------------------|
|                                                                                             | 2021<br>(n=35 countries) | 2020<br>(n=29 countries)                           | 2021<br>(n=29 countries) |
| NCD services included as part of the list of essential health services in the COVID-19 plan |                          |                                                    |                          |
| Cardiovascular disease services                                                             | 95 (20/21)               | N/A                                                | N/A                      |
| Cancer services                                                                             | 86 (18/21)               | N/A                                                | N/A                      |
| Diabetes services                                                                           | 100 (21/21)              | N/A                                                | N/A                      |
| Chronic respiratory disease services                                                        | 86 (12/21)               | N/A                                                | N/A                      |
| Chronic kidney disease and dialysis services                                                | 0 (0/35)                 | N/A                                                | N/A                      |
| Tobacco cessation services                                                                  | 48 (10/21)               | N/A                                                | N/A                      |
| Other                                                                                       | 14 (3/21)                | N/A                                                | N/A                      |
| Additional funding allocated for NCDs                                                       | 26 (9/35)                | 10 (3/29)                                          | 10 (3/29)                |
| <b>NCD activities postponed due to COVID-19 pandemic</b>                                    |                          |                                                    |                          |
| None                                                                                        | 11 (4/35)                | 17 (5/29)                                          | 10 (3/29)                |
| Implementation of NCD Surveys                                                               | 40 (14/35)               | 55 (16/29)                                         | 45 (13/29)               |
| Public screening programs for NCDs                                                          | 51 (18/35)               | 45 (13/29)                                         | 48 (14/29)               |
| WHO PEN package implementation                                                              | 23 (8/35)                | 21 (6/29)                                          | 24 (7/29)                |
| WHO HEARTS package implementation                                                           | 29 (10/35)               | 31 (9/29)                                          | 31 (9/29)                |
| Mass communication campaigns                                                                | 34 (12/35)               | 24 (7/29)                                          | 34 (10/29)               |
| Other                                                                                       | 11 (4/35)                | 24 (7/29)                                          | 10 (3/29)                |

Source: WHO NCD Country Capacity Survey, 2019-2021  
Note: Round 1 (R1) conducted in 2020 and Round 2 (R2) conducted in 2021.  
N/A – not applicable, data for comparison not available between 2020 and 2021.

Regarding service disruptions, outpatient NCD services were suspended in 1 country, community NCD services were suspended in 4 countries and mobile NCD clinics were suspended in 6 countries. The majority of countries reported limited access to outpatient services (19/35 countries, 54%), and to inpatient NCD services (19/35 countries, 54%) (Figure 1).

The disruption in NCD services, either partially or completely, affected all types of care for people with NCDs, but more so for diabetes and hypertension services (Figure 2, and Appendix 4 in supplementary information). The main reasons cited for disruption of NCD services related to human resources, where 17 countries (74%, 17/24 countries) reported it was due to NCD staff deployed to the COVID response, or simply insufficient clinical staff to provide the service (46%, 11/24 countries). Two countries (8%, 2/24 countries) noted clinical staff did not have personal protective equipment which affected service provision. Six countries (25%, 6/24 countries) reported stock out of essential NCD medicines and or diagnostics at the health facility level which affected service continuity. Inpatient NCD services were mainly disrupted due to the cancellation of elective procedures (63%, 15/24 countries), and hospital beds or inpatient

1  
2  
3 service were simply not available in 46% of countries (11/24 countries). The extent of  
4 disruptions for NCD services worsened in 2021, as compared to the situation in 2020 for all  
5 types of NCD services (Figure 2).  
6  
7

8  
9 Beyond service disruption, planned NCD activities have been suspended or postponed due to the  
10 COVID-19 pandemic, and only small improvements over time were observed (Table 2). The  
11 activities most commonly reported as suspended were screening people for cancer, diabetes and  
12 other NCDs in 51% of the countries (18/35 countries), the implementation of NCD surveys,  
13 where 14 countries (40%) report postponing surveys and the implementation of the Hearts  
14 technical package was suspended or postponed in 10 countries.  
15  
16  
17

18  
19 Perhaps the more influential driver of NCD service disruptions, however, is on the demand side,  
20 where COVID-19 lock down measures and fear or mistrust with community transmission led to  
21 many people not seeking care or patients not presenting for care, as reported in 18 countries and  
22 17 countries, respectively (75%, 18/24 countries; 71% 17/24 countries). Financial difficulties  
23 (46% 11/24 countries) and travel restrictions hindering people's access to health facilities (50%,  
24 12/24 countries) were also cited as important causes of disrupted NCD services.  
25  
26  
27  
28

### 29 ***Strategies and plans to mitigate NCD service disruptions***

30  
31 Many different approaches were employed to minimize the disruption in NCD services during  
32 the pandemic which did not change over 2020-2021: home-based care, triage patients and  
33 prioritize care based on severity of condition, and support for self-care were most commonly  
34 reported (Figure 3). Telemedicine was employed to replace in person consultations (16/24  
35 countries, 67%) and this was sustained over time (Appendix 5 in supplementary information).  
36  
37  
38  
39

40 When prompted on plans to reinitiate disrupted NCD services, most respondents indicated that  
41 the priority was to train health care professionals in NCD diagnosis and treatment, re-initiate  
42 cancer screening services, continue use of recurring medicine prescription and continue the use  
43 of telemedicine.  
44  
45  
46

47 Respondents also identified their immediate needs to assist with building stronger health services  
48 for NCDs. The main needs identified were guidelines for NCD and COVID-19 clinical  
49 management; guidance on promoting healthy lifestyles especially post COVID-19 to motivate  
50 behaviour change; extension of telemedicine services to facilitate continuous communication  
51 with patients especially those living in remote areas or large distances from health facilities;  
52 systems for tracking patients with NCDs including Apps that can better support self-  
53  
54  
55  
56  
57

1  
2  
3 management; and rehabilitation services for those people suffering long term symptoms from  
4 COVID-19 including respiratory symptoms.  
5

## 6 7 **DISCUSSION** 8 9

10 This is the only region-wide survey in the Americas, that has systematically measured the NCD  
11 service capacity, the disruption of NCD services due to the COVID-19 pandemic, as well as the  
12 mitigation strategies used to ensure continuity of services. More than half of the countries in the  
13 region do not have the comprehensive package of guidelines, technologies and medicines for all  
14 four major NCDs and there was little reported change between 2019 and 2021 on the NCD  
15 service capacity. Nonetheless, the Americas region has been noted to have among the higher  
16 levels of NCD service capacity as compared to the other World regions [12]; and a much greater  
17 NCD service capacity than as reported in a similar survey conducted in primary care centers in  
18 India.[13]  
19  
20  
21  
22  
23

24 The findings from this regional survey suggest significant and sustained disruptions, affecting all  
25 countries regardless of the country's level of investments in health care or NCD burden. This  
26 situation appears to be consistent with the situation reported in other regions of the  
27 World.[12,14-16]  
28  
29  
30

31 To assist governments in maintaining essential NCD services at this time, PAHO/WHO has  
32 published guidelines to assist with triaging patients, utilize telemedicine and multi-month  
33 prescriptions more broadly, and reorganize oncology services.[17] The extent of use or  
34 application of these guidelines is not known, although the results of this survey indicate that  
35 many national NCD program managers had use for the guidance on maintaining essential NCD  
36 services.  
37  
38  
39  
40

41 More research is needed to document the extent, and consequences of NCD service disruption in  
42 the Americas region. Further research is also needed to better understand how effective the  
43 mitigation strategies of triaging patients, e-prescriptions and telemedicine, were as substitution  
44 for face-to-face encounters; and whether inequities in access to primary NCD services were  
45 further exacerbated by the NCD service disruptions.  
46  
47  
48  
49

50 Some of this research has begun in the region. For example, a survey of NCD patient advocacy  
51 organizations in Latin America, noted the dissatisfaction and poorer quality of care during 2020-  
52 2021, where 52% of respondents experienced delays of 30 days or more for primary care;  
53 telemedicine was reported as not accessible to patients by 37% of respondents and a majority  
54  
55  
56  
57

1  
2  
3 (76%) of NCD patients faced challenges with refilling prescription medication.[18] In Mexico,  
4 the social security system, IMSS, noted reduced screening for breast and cervical cancer (−79%  
5 and −68%), diabetes and hypertension care (−32% in both), attributed to underfunding, shortages  
6 in human resources and reallocation of health staff and infrastructure due to COVID-19.[19]  
7  
8  
9

10 Similarly in the USA, cancer screening declined sharply in 2020 compared with 2019, (breast,  
11 −90.8%; colorectal, −79.3%; prostate, −63.4%) and breast cancer diagnosis has been observed  
12 to decrease during the pandemic.[20-21] The USA has also been noted to have the highest  
13 absolute number of excess deaths in 2020 (458,000) as compared to 29 other countries.[22] A  
14 large excess death rate of 64% more deaths in 2020 than 2019 were also reported in Ecuador,  
15 where it was found that indigenous populations had four times the excess death rate of the  
16 majority mestizo group, indicating unequal impact of COVID on vulnerable populations.[23]  
17  
18  
19  
20  
21

22 Brazil has also reported significant declines in utilization of primary care services by people with  
23 NCDs [24], and in one state almost a third of people living with NCDs reported impaired  
24 management of their NCD as a result of the COVID-19 restrictions.[25] Brazil has also noted  
25 excess deaths from cancer and cardiovascular diseases related to the COVID-19 pandemic.[26]  
26 The full extent of foregone care, however are yet to be observed, and more research is needed  
27 throughout countries in the Americas region, to determine the impact of NCD service disruptions  
28 on diagnosis, treatment and health outcomes for people with NCDs. For example, in the USA,  
29 cancer mortality is expected to increase due to reduced screening and early diagnosis [20], and in  
30 the U.K., a substantial increase in cancer deaths and morbidity have been predicted due to  
31 COVID-19 restrictions.[27-29]  
32  
33  
34  
35  
36  
37

38 Improving NCD service capacity and NCD management is tied closely to universal health  
39 coverage and primary care strengthening. As a way forward, the Americas region has charted a  
40 path for creating more resilient health services, which includes strengthening primary care and  
41 increasing financial investments in health systems.[30] And as COVID-19 cases continue to  
42 decline and health services resume to capacity, the public health priority now needs to be on  
43 improving the equitable access to NCD diagnosis and treatment in primary care, which includes  
44 updating NCD guidelines, training multi-disciplinary health care teams, increasing access to  
45 essential NCD medicines and technologies, improving self-management support, among  
46 others.[31] With regards to NCD medicines and technologies, governments in the Americas  
47 region can utilize the PAHO Strategic Fund which offers a useful mechanism for pooled  
48 procurement of quality assured essential NCD medicines and technologies, and was successfully  
49 deployed in government responses to COVID-19, and other health priorities.[32]  
50  
51  
52  
53  
54  
55  
56  
57  
58  
59  
60

## CONCLUSIONS

This analysis documents the limitations in NCD service capacity in the Americas region, and the degree of disruptions in access to essential NCD services and medicines. While there is limited published data on the impact that these service disruptions will have on health outcomes, given the significant number of people with NCDs in the Americas, the limited NCD service capacity and extensive disruptions in NCD services from the COVID-19 pandemic, the priority must now be strengthening primary care services for NCDs and addressing the backlog and foregone care for NCD management.

**Contributor statement:** SL and RC conceived the original idea. RC, CC, DO collected and analyzed the data. All authors interpreted the results. SL wrote the initial paper, all authors reviewed and contributed to the paper. All authors reviewed and approved the final version.

**Competing interests:** None

**Funding:** None

**Data sharing statement:** Data reported in this analysis are from the Global NCD Country Capacity Survey and may be obtained from the World Health Organization and are available in the WHO Global Health Observatory.

**Ethics statement:** This study does not involve human participants and ethical approval was not required.

**Patient and public involvement statement:** It was not appropriate or possible to involve patients or the public in the design, or conduct, or reporting, or dissemination plans of this analysis which involved data collection and analysis from information provided by the Ministry of Health national NCD program managers in the Americas region.



## REFERENCES

1. United Nations. Political Declaration of the High-level Meeting on Universal Health Coverage “Universal health coverage: moving together to build a healthier world”. New York: UN; 2019. Accessed April 8, 2022: <https://www.un.org/pga/73/wp-content/uploads/sites/53/2019/07/FINAL-draft-UHC-Political-Declaration.pdf>
2. World Health Organization. Global Action Plan for the Prevention and Control of NCDs 2013-2020. Geneva:WHO; 2013. Accessed April 8, 2022: <https://www.who.int/publications/i/item/9789241506236>
3. World Health Organization. NCD Global Monitoring Framework. Indicator Definitions and Specifications. Geneva:WHO; 2014. Accessed April 8, 2022: <https://www.who.int/publications/m/item/noncommunicable-diseases-global-monitoring-framework-indicator-definitions-and-specifications>
4. World Health Organization. Tackling NCDs Best Buys. Best buys and other recommended interventions for the prevention and control of noncommunicable diseases. Geneva:WHO; 2017. Accessed April 25 2022: <https://apps.who.int/iris/bitstream/handle/10665/259232/WHO-NMH-NVI-17.9-eng.pdf>
5. Clark A, Jit M, Warren-Gash C, Guthrie B, Wang HHX, Mercer SW, et al. Global, regional, and national estimates of the population at increased risk of severe COVID-19 due to underlying health conditions in 2020: a modelling study. *Lancet Glob Heal* 2020;8(8):e1003-e1017.
6. Pan American Health Organization. Plan of action for the prevention and control of noncommunicable diseases. Washington, DC: PAHO; 2014. Accessed April 8, 2022: <https://iris.paho.org/handle/10665.2/35009>
7. Pan American Health Organization. Plan of Action for the Prevention and Control of Noncommunicable Diseases: Final Report. Washington, DC:PAHO; 2020. Accessed April 8, 2022: <https://www.paho.org/en/documents/cd58inf6-plan-action-prevention-and-control-noncommunicable-diseases-final-report>
8. Pan American Health Organization. PAHO COVID-19 Dashboard Washington, D.C.: PAHO; 2022. Accessed May 2, 2022: <https://ais.paho.org/hip/viz/COVID19Table.asp>
9. Azarpazhooh MR, Morovatdar N, Avan A, Phan TG, Divani AA, Yassi N, et al. COVID-19 Pandemic and Burden of Non-Communicable Diseases: An Ecological Study on Data of 185 Countries. *J Stroke Cerebrovasc Dis*. 2020;29(9):105089.
10. Chang AY, Cullen MR, Harrington RA, Barry M. The impact of novel coronavirus COVID-19 on noncommunicable disease patients and health systems: a review. *J Intern Med* 2021; 289: 450–462.

11. World Health Organization. Third round of the global pulse survey on continuity of essential health services during the COVID-19 pandemic. Geneva:WHO; 2021. Accessed April 10, 2022: [https://www.who.int/publications/i/item/WHO-2019-nCoV-EHS\\_continuity-survey-2022](https://www.who.int/publications/i/item/WHO-2019-nCoV-EHS_continuity-survey-2022)
12. World Health Organization. Rapid assessment of service delivery for NCDs during the COVID-19 pandemic. Geneva: WHO; 2020. Accessed April 8 2022: <https://www.who.int/publications/m/item/rapid-assessment-of-service-delivery-for-ncds-during-the-covid-19-pandemic>
13. Krishnan A, Mathur P, Kulothungan V, Salve HR, Leburu S, Amarchand R, et al. Preparedness of primary and secondary health facilities in India to address major noncommunicable diseases: results of a National Noncommunicable Disease Monitoring Survey (NNMS). *BMC Health Serv Res.* 2021;21(1):757.
14. Dyer O. Covid-19: Pandemic is having “severe” impact on non-communicable disease care, WHO survey finds. *BMJ* 2020; 369:m2210.
15. Suva MA, Suvarna VR, Mohan V. Impact of COVID-19 on Noncommunicable Diseases. *J Diabetol* 2020;12(3):252-256.
16. Ágh T, van Boven JFM, Wettermark B, Menditto E, Pinnock H, Tsiligianni I, et al. A Cross-Sectional Survey on Medication Management Practices for Noncommunicable Diseases in Europe During the Second Wave of the COVID-19 Pandemic. *Front. Pharmacol.* 2021;12:685696.
17. Pan American Health Organization. Maintaining Essential Services for People with Noncommunicable Diseases. 2020. Accessed April 28, 2022: <https://iris.paho.org/handle/10665.2/52493>
18. Kruse MH, Durstine A, Evans DP. Effect of COVID-19 on patient access to health services for noncommunicable diseases in Latin America: a perspective from patient advocacy organizations. *Int J Equity Health.* 2022Apr2;21(1):45.
19. Doubova SV, Robledo-Aburto ZA, Duque-Molina C, Borrayo-Sánchez G, González-León M, Avilés-Hernández R, et al. Overcoming disruptions in essential health services during the COVID-19 pandemic in Mexico. *BMJ Global Health* 2022;7:e008099.
20. Chen RC, Haynes K, Du S, Barron J, Katz AJ. Association of Cancer Screening Deficit in the United States With the COVID-19 Pandemic. *JAMA Oncol.* 2021;7(6):878-884.
21. Kang YJ, Baek JM, Kim YS, Jeon YW, Yoo TK, Rhu J, et al. Impact of the COVID-19 Pandemic on the Diagnosis and Surgery of Breast Cancer: A Multi-Institutional Study. *J Breast Cancer.* 2021;24(6):491-503.

22. Islam N, Shkolnikov VM, Acosta RJ, Klimkin I, Kawachi I, Irizarry RA, et al. Excess deaths associated with Covid-19 pandemic in 2020: age and sex disaggregated time series analysis in 29 high income countries. *BMJ*. 2021;373:n1137.
23. Cuéllar L, Torres I, Romero-Severson E, Mahesh R, Ortega N, Pungitore S, et al. Excess deaths reveal unequal impact of COVID-19 in Ecuador. *BMJ Glob Health*. 2021;6(9).
24. Malta DC, Gomes CS, Silva AGD, Cardoso LSM, Barros MBA, Lima MG, et al. Use of health services and adherence to social distancing by adults with Noncommunicable Diseases during the COVID-19 pandemic, Brazil, 2020. *Cien Saude Colet*. 2021;26(7):2833-42.
25. Leite JS, Feter N, Caputo EL, Doring IR, Cassuriaga J, Reichert FF, et al. Managing noncommunicable diseases during the COVID-19 pandemic in Brazil: findings from the PAMPA cohort. *Cien Saude Colet*. 2021;26(3):987-1000.
26. Jardim B, Migowski A, Corrêa FM, et al. Covid-19 in Brazil in 2020: impact on deaths from cancer and cardiovascular diseases. *Rev Saude Publica*. 2022 Apr 22;56:22.
27. Sud A, Torr B, Jones ME, et al. Effect of delays in the 2-week-wait cancer referral pathway during the COVID-19 pandemic on cancer survival in the UK: a modelling stud. *Lancet Oncol* 2020; 21: 1035–44.
28. Maringe C, Spicer J, Morris M, et al. The impact of the COVID-19 pandemic on cancer deaths due to delays in diagnosis in England, UK: a national, population-based, modelling study. *Lancet Oncol*. 2020 Aug; 21(8): 1023–1034.
29. Lai A, Pasea L, Banerjee A, Hall G, Denaxas S, Chang WH, et al. Estimated impact of the COVID-19 pandemic on cancer services and excess 1-year mortality in people with cancer and multimorbidity: near real-time data on cancer care, cancer deaths and a population-based cohort study. *BMJ Open* 2020;10:e043.
30. Etienne CF, Fitzgerald J, Almeida G, Birmingham ME, Brana M, Bascolo E. COVID-19: transformative actions for more equitable, resilient, sustainable societies and health systems in the Americas. *BMJ Glob Health*. 2020;5:e003509.
31. Luciani S, Agurto I, Caixeta R, Hennis A. Prioritizing Noncommunicable Diseases in the Americas Region in the Era of Covid-19. *PAHO J Pub Hlth*; 2022: in press.
32. Lal A, Lim C, Almeida G, Fitzgerald J. Minimizing COVID-19 disruption: Ensuring the supply of essential health products for health emergencies and routine health services. *The Lancet Regional Health – Americas*. 2022;6:100129.

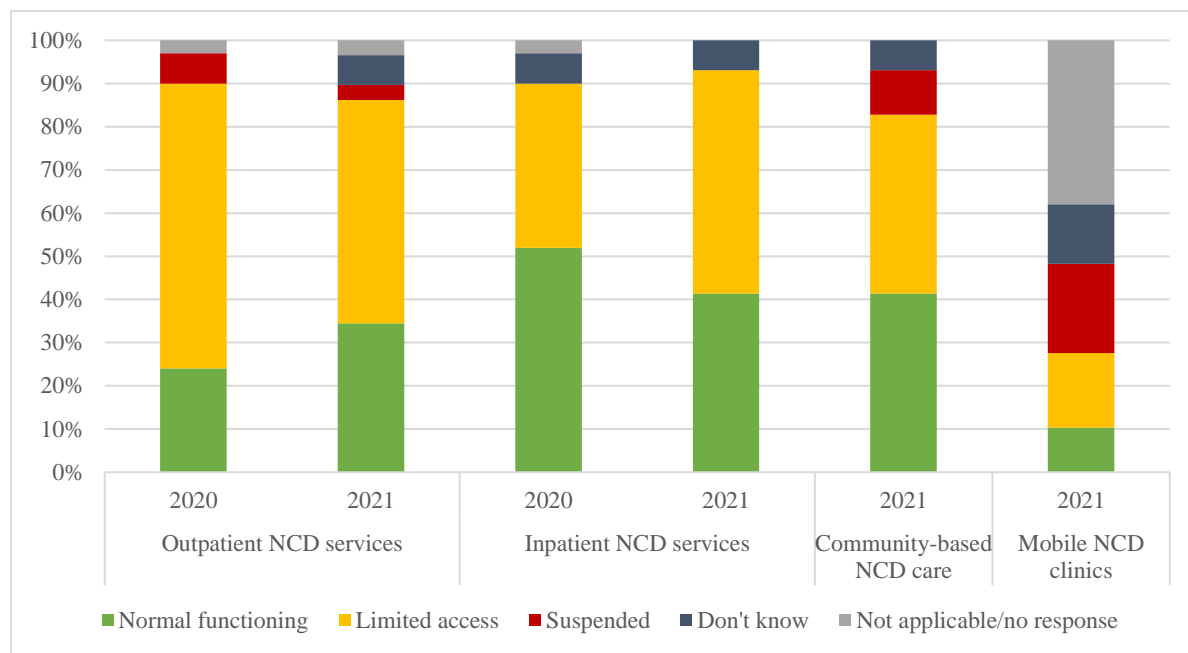

**Figure 1.** Proportion of countries (%) with disruptions in NCD services during the COVID-19 pandemic, Americas region, 2020-2021

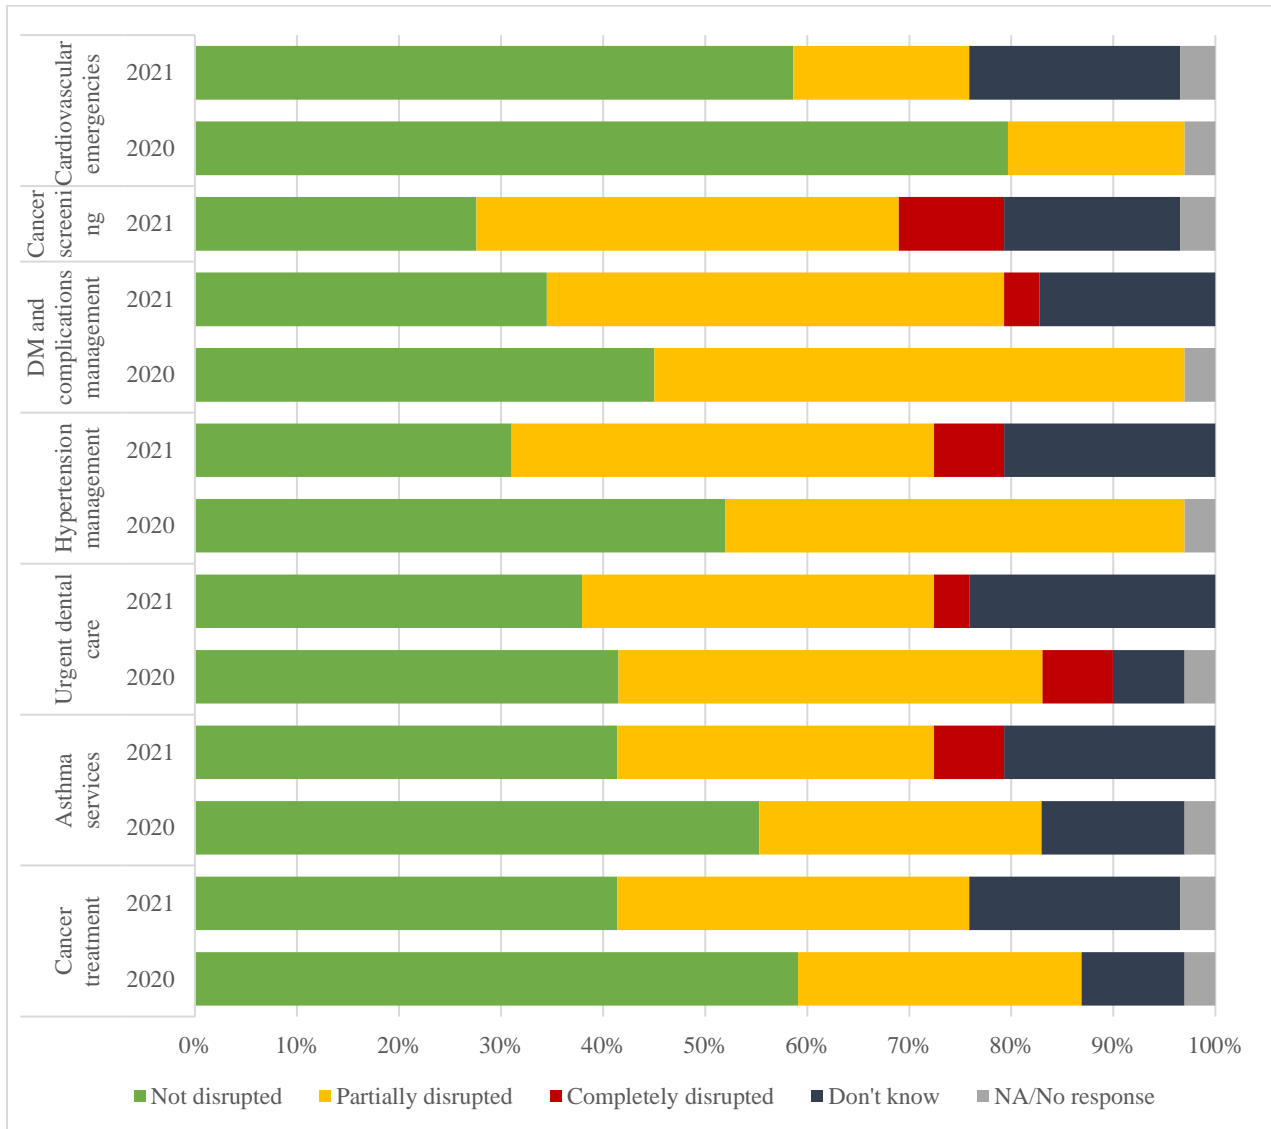

**Figure 2:** Proportion of countries (%) with NCD Service Disruptions by Service Type due to the COVID-19 pandemic, Americas Region, 2020-2021

Abbreviations: N/A: not applicable, country does not provide the service. DM: diabetes mellitus. Notes: cancer screening was not included in the 2020 survey. Cardiovascular emergencies include myocardial infarctions, stroke, and cardiac arrhythmias.

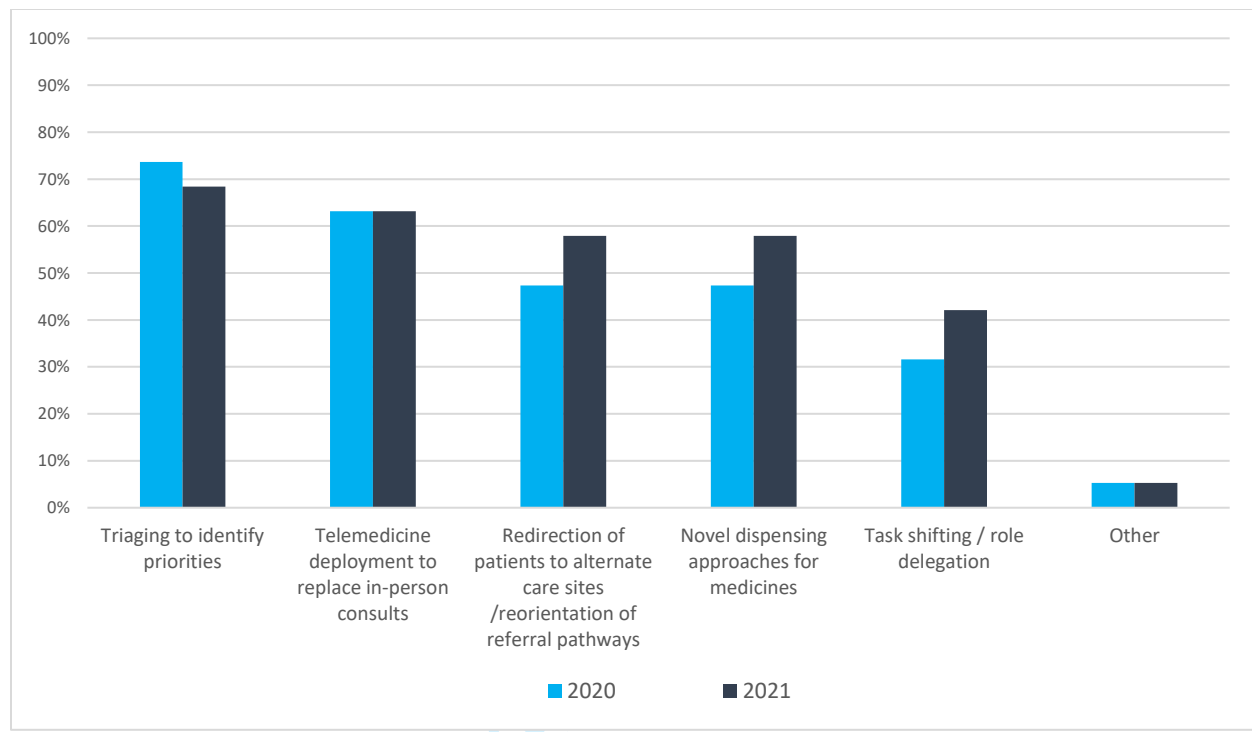

**Figure 3:** Proportion of countries (%) with approaches employed to overcome NCD service disruptions due to COVID-19 Pandemic, Americas Region, 2020-2021

## Supplemental material

|                                                                                                                                                                |   |
|----------------------------------------------------------------------------------------------------------------------------------------------------------------|---|
| <b>Appendix 1.</b> Countries of the Americas region included in the analysis.....                                                                              | 2 |
| <b>Appendix 2:</b> Availability of guidelines/protocols for the management of NCDs, referred by national NCD programs. Region of the Americas, 20019-2021..... | 3 |
| <b>Appendix 3.</b> Access to NCD services during the COVID-19 pandemic. Americas region, 2020-2021.....                                                        | 4 |
| <b>Appendix 4.</b> NCD service disruption due to COVID-19. Region of the Americas, 2021 results..                                                              | 5 |
| <b>Appendix 5.</b> Approaches employed to overcome NCD service disruptions due to COVID-19 Pandemic. Americas Region, 2020-2021.....                           | 6 |

**Appendix 1.** Countries of the Americas region included in the analysis

| Country                                             | Population (thousands) | Public health expenditure as % of GDP | NCD Mortality Rate (age-adjusted per 100 000 pop) |
|-----------------------------------------------------|------------------------|---------------------------------------|---------------------------------------------------|
| <b>Northern America</b>                             |                        |                                       |                                                   |
| Canada                                              | 38,067.90              | 7.9                                   | 302                                               |
| United States of America                            | 332,915.10             | 8.5                                   | 408                                               |
| <b>Mexico, Central America, and Latin Caribbean</b> |                        |                                       |                                                   |
| Belize                                              | 404.9                  | 3.9                                   | 452                                               |
| Costa Rica                                          | 5,139.10               | 5.5                                   | 310                                               |
| Cuba                                                | 11,317.50              | 9.9                                   | 431                                               |
| Dominican Republic                                  | 10,953.70              | 2.5                                   | 508                                               |
| El Salvador                                         | 6,518.50               | 4.5                                   | 393                                               |
| Guatemala                                           | 18,249.90              | 2.1                                   | 498                                               |
| Honduras                                            | 10,063.00              | 2.8                                   | 615                                               |
| Mexico                                              | 130,262.20             | 2.7                                   | 466                                               |
| Nicaragua                                           | 6,702.40               | 5.1                                   | 548                                               |
| Panama                                              | 4,381.60               | 4.6                                   | 335                                               |
| <b>South America</b>                                |                        |                                       |                                                   |
| Argentina                                           | 45,605.80              | 5.9                                   | 436                                               |
| Bolivia                                             | 11,832.90              | 4.5                                   | 584                                               |
| Brazil                                              | 213,993.40             | 4                                     | 425                                               |
| Chile                                               | 19,212.40              | 4.6                                   | 329                                               |
| Colombia                                            | 51,265.80              | 5.5                                   | 327                                               |
| Ecuador                                             | 17,888.50              | 4.2                                   | 365                                               |
| Peru                                                | 33,359.40              | 3.3                                   | 304                                               |
| Paraguay                                            | 7,219.60               | 2.9                                   | 448                                               |
| Uruguay                                             | 3,485.20               | 6.7                                   | 446                                               |
| Venezuela                                           | 28,704.90              | 1.7                                   | 412                                               |
| <b>Non-Latin Caribbean</b>                          |                        |                                       |                                                   |
| Antigua and Barbuda                                 | 98.70                  | 2.9                                   | 502                                               |
| Bahamas                                             | 396.90                 | 3.1                                   | 533                                               |
| Barbados                                            | 287.70                 | 2.9                                   | 477                                               |
| Dominica                                            | 74.30                  | 4.3                                   | .                                                 |
| Grenada                                             | 113.00                 | 1.7                                   | 619                                               |
| Guyana                                              | 790.30                 | 3.7                                   | 802                                               |
| Haiti                                               | 11,541.70              | 0.9                                   | 839                                               |
| Jamaica                                             | 2,973.50               | 3.9                                   | 455                                               |
| Saint Kitts and Nevis                               | 54.20                  | 2.5                                   | .                                                 |
| Saint Lucia                                         | 184.40                 | 2.1                                   | 516                                               |
| Saint Vincent and the Grenadines                    | 111.30                 | 3.1                                   | 537                                               |
| Suriname                                            | 591.80                 | 5.3                                   | 666                                               |
| Trinidad and Tobago                                 | 1,403.40               | 3.4                                   | 439                                               |

Source: PAHO Core Indicators, 2022



1  
2  
3  
4  
5  
6  
7  
8  
9  
10  
11  
12  
13  
14  
15  
16  
17  
18  
19  
20  
21  
22  
23  
24  
25  
26  
27  
28  
29  
30  
31  
32  
33  
34  
35  
36  
37  
38  
39  
40  
41  
42  
43  
44  
45  
46  
47

**Appendix 2:** Availability of guidelines/protocols for the management of NCDs, referred by national NCD programs. Region of the Americas, 20019-2021

| NCD guidelines/protocols                           | Hypertension |      | Diabetes |      | Cancer |      | Chronic respiratory |      | NCD4 Guidelines/protocols |      |
|----------------------------------------------------|--------------|------|----------|------|--------|------|---------------------|------|---------------------------|------|
|                                                    | 2019         | 2021 | 2019     | 2021 | 2019   | 2021 | 2019                | 2021 | 2019                      | 2021 |
| Availability                                       | 86%          | 89%  | 97%      | 97%  | 77%    | 89%  | 66%                 | 71%  | 54%                       | 63%  |
| Utilized in at least 50% of health care facilities | 73%          | 69%  | 74%      | 74%  | 70%    | 60%  | 74%                 | 51%  | 34%                       | 40%  |
| Last time updated                                  |              |      |          |      |        |      |                     |      |                           |      |
| last 5 years                                       | 23%          | 46%  | 46%      | 63%  | 26%    | 31%  | 14%                 | 17%  | .                         | .    |
| 6 to 10 years                                      | 40%          | 26%  | 23%      | 11%  | 34%    | 29%  | 23%                 | 23%  | .                         | .    |
| >10 years                                          | 20%          | 11%  | 23%      | 14%  | 14%    | 23%  | 20%                 | 26%  | .                         | .    |
| Includes referral criteria                         | 77%          | 77%  | 82%      | 89%  | 85%    | 80%  | 78%                 | 60%  | 37%                       | 49%  |

Source: WHO NCD Country Capacity Survey, 2019-2021.

**Appendix 3.** Access to NCD services during the COVID-19 pandemic. Americas region, 2020-2021

| NCD services               | Countries R2 (%)         | Same countries R1 and R2 (%) |                          |
|----------------------------|--------------------------|------------------------------|--------------------------|
|                            | 2021<br>(n=35 countries) | 2020<br>(n=29 countries)     | 2021<br>(n=29 countries) |
| Outpatient NCD services    |                          |                              |                          |
| Functioning as normal      | 34% (12/35)              | 24% (7/29)                   | 34% (10/29)              |
| Limited access             | 54% (19/35)              | 66% (19/29)                  | 52% (15/29)              |
| Suspended                  | 3% (1/35)                | 7% (2/29)                    | 3% (1/29)                |
| Don't know                 | 6% (2/35)                | 0% (2/29)                    | 7% (2/29)                |
| Not applicable/No response | 3% (1/35)                | 3% (1/29)                    | 3% (1/29)                |
| Inpatient NCD services     |                          |                              |                          |
| Functioning as normal      | 40% (14/35)              | 52% (15/29)                  | 41% (12/29)              |
| Limited access             | 54% (19/35)              | 38% (11/29)                  | 52% (15/29)              |
| Suspended                  | 0% (2/35)                | 0% (0/29)                    | 0% (0/29)                |
| Don't know                 | 6% (2/35)                | 7% (2/29)                    | 7% (2/29)                |
| Not applicable/No response | 0% (2/35)                | 3% (1/29)                    | 0% (2/29)                |
| Community-based NCD care   |                          |                              |                          |
| Functioning as normal      | 37% (13/35)              | N/A                          | 41% (12/29)              |
| Limited access             | 43% (15/35)              | N/A                          | 41% (12/29)              |
| Suspended                  | 11% (4/35)               | N/A                          | 10% (3/29)               |
| Don't know                 | 6% (2/35)                | N/A                          | 7% (2/29)                |
| Not applicable/No response | 3% (1/35)                | N/A                          | 0% (2/29)                |
| Mobile NCD clinics         |                          |                              |                          |
| Functioning as normal      | 11% (4/35)               | N/A                          | 10% (3/29)               |
| Limited access             | 23% (8/35)               | N/A                          | 17% (5/29)               |
| Suspended                  | 17% (6/35)               | N/A                          | 21% (6/29)               |
| Don't know                 | 14% (5/35)               | N/A                          | 14% (4/29)               |
| Not applicable/No response | 34% (12/35)              | N/A                          | 38% (11/29)              |

Source: WHO NCD Country Capacity Survey, 2019-2021

Note: Round 1 (R1) conducted in 2020 and Round 2 (R2) conducted in 2021.

N/A – not applicable, data for comparison not available between 2020 and 2021.

**Appendix 4.** NCD service disruption due to COVID-19. Region of the Americas, 2021 results.

1  
2  
3  
4  
5  
6  
7  
8  
9  
10  
11  
12  
13  
14  
15  
16  
17  
18  
19  
20  
21  
22  
23  
24  
25  
26  
27  
28  
29  
30  
31  
32  
33  
34  
35  
36  
37  
38  
39  
40  
41  
42  
43  
44  
45  
46  
47

| Disruption level     | Hypertension management |         | Cardio-vascular emergencies |         | Cancer screening |         | Cancer treatment |         | Diabetes and complications |         | Asthma  |         | Urgent dental care |         | Rehabilitation |      | Palliative care |      |
|----------------------|-------------------------|---------|-----------------------------|---------|------------------|---------|------------------|---------|----------------------------|---------|---------|---------|--------------------|---------|----------------|------|-----------------|------|
|                      | 2020                    | 2021    | 2020                        | 2021    | 2020             | 2021    | 2020             | 2021    | 2020                       | 2021    | 2020    | 2021    | 2020               | 2021    | 2020           | 2021 | 2020            | 2021 |
| Not disrupted        | 52%                     | 31%     | 79%                         | 59%     | N/A              | 28%     | 59%              | 41%     | 45%                        | 34%     | 55%     | 41%     | 41%                | 38%     | 14%            | N/A  | 24%             | N/A  |
| Partially disrupted  | (15/29)                 | (9/29)  | (23/29)                     | (17/29) | N/A              | (8/29)  | 17/29)           | (12/29) | (13/29)                    | (10/29) | (16/29) | (12/29) | (12/29)            | (11/29) | (4/29)         | N/A  | (7/29)          | N/A  |
| Completely disrupted | 45%                     | 41%     | 17%                         | 17%     | N/A              | 41%     | 28%              | 34%     | 52%                        | 45%     | 28%     | 31%     | 41%                | 34%     | 38%            | N/A  | 34%             | N/A  |
| Don't know           | (13/29)                 | (12/29) | (5/29)                      | (5/29)  | N/A              | (12/29) | (8/29)           | (10/29) | (15/29)                    | (13/29) | (8/29)  | (9/29)  | (12/29)            | (10/29) | (11/29)        | N/A  | (10/29)         | N/A  |
| NA/NR                | 0%                      | 7%      | 0%                          | 0%      | N/A              | 10%     | 0%               | 0%      | 0%                         | 3%      | 0%      | 7%      | 7%                 | 3%      | 21%            | N/A  | 7%              | N/A  |
|                      | (0/29)                  | (2/29)  | (0/29)                      | (0/29)  | N/A              | (3/29)  | (0/29)           | (0/29)  | (0/29)                     | (1/29)  | (0/29)  | (2/29)  | (2/29)             | (1/29)  | (6/29)         | N/A  | (2/29)          | N/A  |
|                      | 0%                      | 21%     | 0%                          | 21%     | N/A              | 17%     | 10%              | 21%     | 0%                         | 17%     | 14%     | 21%     | 7%                 | 24%     | 24%            | N/A  | 31%             | N/A  |
|                      | (0/29)                  | (6/29)  | (0/29)                      | (6/29)  | N/A              | (5/29)  | (3/29)           | (6/29)  | (0/29)                     | (5/29)  | (4/29)  | (6/29)  | (2/29)             | (7/29)  | (7/29)         | N/A  | (9/29)          | N/A  |
|                      | 3%                      | 0%      | 3%                          | 3%      | N/A              | 3%      | 3%               | 3%      | 3%                         | 0%      | 3%      | 0%      | 3%                 | 0%      | 3%             | N/A  | 3%              | N/A  |
|                      | (1/29)                  | (0/29)  | (1/29)                      | (1/29)  | N/A              | (1/29)  | (1/29)           | (1/29)  | (1/29)                     | (0/29)  | (1/29)  | (0/29)  | (1/29)             | (0/29)  | (1/29)         | N/A  | (1/29)          | N/A  |

<sup>19</sup>Source: WHO NCD Country Capacity Survey, 2019-2021  
<sup>20</sup>N/A – not applicable, data for comparison not available between 2020 and 2021.  
<sup>21</sup>NR – no response

**Appendix 5.** Approaches employed to overcome NCD service disruptions due to COVID-19 Pandemic. Americas Region, 2020-2021.

| Approaches to overcome NCD service disruption                                       | Countries R2 (%)      | Same countries R1 and R2 (%) |                       |
|-------------------------------------------------------------------------------------|-----------------------|------------------------------|-----------------------|
|                                                                                     | 2021 (n=35 countries) | 2020 (n=29 countries)        | 2021 (n=29 countries) |
| Triaging to identify priorities                                                     | 75% (18/24)           | 74% (14/19)                  | 68% (13/19)           |
| Telemedicine deployment to replace in-person consults                               | 67% (16/24)           | 63% (12/19)                  | 63% (12/19)           |
| Redirection of patients to alternate care sites /reorientation of referral pathways | 67% (16/24)           | 47% (9/19)                   | 58% (11/19)           |
| Novel dispensing approaches for medicines                                           | 63% (15/24)           | 47% (9/19)                   | 58% (11/19)           |
| Task shifting / role delegation                                                     | 38% (9/24)            | 32% (6/19)                   | 42% (8/19)            |
| Other                                                                               | 8% (2/24)             | 5% (1/19)                    | 5% (1/19)             |
| Integration of several services into single visit                                   | 38% (9/24)            | N/A                          | N/A                   |
| Self-care interventions where appropriate                                           | 75% (18/24)           | N/A                          | N/A                   |
| Provision of home-based care where appropriate                                      | 75% (18/24)           | N/A                          | N/A                   |
| Catch-up campaigns for missed appointments                                          | 25% (6/24)            | N/A                          | N/A                   |
| Recruitment of additional staff                                                     | 67% (16/24)           | N/A                          | N/A                   |
| Expanding facility hours                                                            | 29% (7/24)            | N/A                          | N/A                   |
| Novel supply chain management and logistics approaches                              | 33% (8/24)            | N/A                          | N/A                   |
| Novel prescribing approaches (e.g. tele-prescription, extended drug prescriptions)  | 63% (15/24)           | N/A                          | N/A                   |
| Community communications                                                            | 75% (18/24)           | N/A                          | N/A                   |
| Government removal of user fees                                                     | 0% (0/24)             | N/A                          | N/A                   |

Source: WHO NCD Country Capacity Survey, 2019-2021

N/A – not applicable, data for comparison not available between 2020 and 2021.

NR – no response.

# BMJ Open

**What is the NCD Service Capacity and Disruptions due to COVID-19?  
Results from the WHO Noncommunicable Disease Country Capacity Survey in the Americas Region**

|                                 |                                                                                                                                                                                                                                                                  |
|---------------------------------|------------------------------------------------------------------------------------------------------------------------------------------------------------------------------------------------------------------------------------------------------------------|
| Journal:                        | <i>BMJ Open</i>                                                                                                                                                                                                                                                  |
| Manuscript ID                   | bmjopen-2022-070085.R1                                                                                                                                                                                                                                           |
| Article Type:                   | Original research                                                                                                                                                                                                                                                |
| Date Submitted by the Author:   | 31-Jan-2023                                                                                                                                                                                                                                                      |
| Complete List of Authors:       | Luciani, Silvana; Pan American Health Organization, Caixeta, Roberta ; Pan American Health Organization Chavez, Carolina; Pan American Health Organization Ondarsuhu, Dolores; Pan American Health Organization Hennis, Anselm; Pan American Health Organization |
| <b>Primary Subject Heading</b>: | Global health                                                                                                                                                                                                                                                    |
| Secondary Subject Heading:      | Public health                                                                                                                                                                                                                                                    |
| Keywords:                       | COVID-19, PUBLIC HEALTH, Organisation of health services < HEALTH SERVICES ADMINISTRATION & MANAGEMENT                                                                                                                                                           |
|                                 |                                                                                                                                                                                                                                                                  |

SCHOLARONE™  
Manuscripts

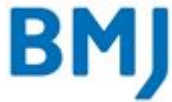

I, the Submitting Author has the right to grant and does grant on behalf of all authors of the Work (as defined in the below author licence), an exclusive licence and/or a non-exclusive licence for contributions from authors who are: i) UK Crown employees; ii) where BMJ has agreed a CC-BY licence shall apply, and/or iii) in accordance with the terms applicable for US Federal Government officers or employees acting as part of their official duties; on a worldwide, perpetual, irrevocable, royalty-free basis to BMJ Publishing Group Ltd ("BMJ") its licensees and where the relevant Journal is co-owned by BMJ to the co-owners of the Journal, to publish the Work in this journal and any other BMJ products and to exploit all rights, as set out in our [licence](#).

The Submitting Author accepts and understands that any supply made under these terms is made by BMJ to the Submitting Author unless you are acting as an employee on behalf of your employer or a postgraduate student of an affiliated institution which is paying any applicable article publishing charge ("APC") for Open Access articles. Where the Submitting Author wishes to make the Work available on an Open Access basis (and intends to pay the relevant APC), the terms of reuse of such Open Access shall be governed by a Creative Commons licence – details of these licences and which [Creative Commons](#) licence will apply to this Work are set out in our licence referred to above.

Other than as permitted in any relevant BMJ Author's Self Archiving Policies, I confirm this Work has not been accepted for publication elsewhere, is not being considered for publication elsewhere and does not duplicate material already published. I confirm all authors consent to publication of this Work and authorise the granting of this licence.

1  
2  
3 **What is the NCD Service Capacity and Disruptions due to COVID-19?**  
4 **Results from the WHO Noncommunicable Disease Country Capacity Survey in the**  
5 **Americas Region**  
6  
7

8  
9 Silvana Luciani<sup>1</sup>, Roberta Caixeta<sup>1</sup>, Carolina Chavez<sup>1</sup>, Dolores Ondarsuhu<sup>1</sup>, Anselm Hennis<sup>1</sup>  
10

11  
12 <sup>1</sup>Department of Noncommunicable Diseases and Mental Health  
13 Pan American Health Organization  
14 525 23<sup>RD</sup> St NW  
15 Washington, DC, USA  
16  
17

18  
19  
20 Corresponding author:  
21 Silvana Luciani  
22 [lucianis@paho.org](mailto:lucianis@paho.org)  
23  
24

25  
26  
27 **keywords:** public health, hypertension, diabetes, cancer, COVID-19  
28  
29

30 **wordcount:** 2,941  
31  
32  
33  
34  
35  
36  
37  
38  
39  
40  
41  
42  
43  
44  
45  
46  
47  
48  
49  
50  
51  
52  
53  
54  
55  
56  
57  
58  
59  
60

## ABSTRACT

**Objective:** This article presents the Americas regional results of the World Health Organization Noncommunicable Diseases (NCD) Country Capacity Survey from 2019-2021, on NCD service capacity and disruptions from the COVID-19 pandemic.

**Setting:** Information on public sector primary care services for NCDs, and related technical inputs from 35 countries in the Americas region are provided.

**Participants:** All Ministry of Health officials managing a national NCD program, from a WHO Member State in the Americas region, were included throughout this study. Government health officials from countries that are not WHO Member States were excluded.

**Outcome measures:** The availability of evidence based NCD guidelines, essential NCD medicines and basic technologies in primary care, cardiovascular disease risk stratification, cancer screening and palliative care services were measured in 2019, 2020 and 2021. NCD service interruptions, reassignments of NCD staff during the COVID-19 pandemic and mitigation strategies to reduce disruptions for NCD services were measured in 2020 and 2021.

**Results:** More than 50% of countries reported a lack of comprehensive package of NCD guidelines, essential medicines, and related service inputs. Extensive disruptions in NCD services resulted from the pandemic, with only 12/35 countries (34%), reporting that outpatient NCD services were functioning normally. Ministry of Health staff were largely redirected to work on the COVID-19 response, either full-time or partially, reducing the human resources available for NCD services. Six of 24 countries (25%) reported stock out of essential NCD medicines and/or diagnostics at health facilities which affected service continuity. Mitigation strategies to ensure continuity of care for people with NCDs were deployed in many countries and included triaging patients, telemedicine and tele-consultations, and electronic prescriptions and other novel prescribing practices.

**Conclusions:** The findings from this regional survey suggest significant and sustained disruptions, affecting all countries regardless of the country's level of investments in health care or NCD burden.



**Strengths and limitations of this study:**

- This is the only region-wide analysis in the Americas, with data from 2019-2021, that has systematically measured the NCD service capacity, disruptions of NCD services due to the COVID-19 pandemic, as well as the mitigation strategies used to ensure continuity of services across 35 countries.
- It is based on validated government information from a global standardized methodology, applied by the World Health Organization (WHO) since 2001 to monitor country capacity for NCD policies and services.
- The main limitation is that this study did not provide the specificity of information by health center level of NCD service capacity and disruptions during the COVID-19 pandemic. In addition, it did not provide information on the impact of these disruptions on people's health outcomes.
- The methodological limitation of this study is that it uses a self-administered questionnaire, and the process for responding to the questions could have varied across countries, with little space for qualitative data collection that could contribute to better understand the reasons for service disruptions. Also, country names, for comparison purposes, was not possible due to agreements in this global WHO survey with Member States.

## INTRODUCTION

People with noncommunicable diseases (NCDs) require timely diagnosis, continuous treatment and access to essential medicines, as well as ongoing monitoring of their conditions to prevent complications and premature death. Yet health systems in most low- and middle-income countries are not adequately equipped to meet the growing NCD health demands, which has led to global calls for universal health coverage and strengthening primary care services to improve NCD (cardiovascular diseases, cancer, diabetes, chronic respiratory diseases) prevention and control.[1,2] The World Health Organization has established, and routinely monitors, targets to strengthen the health system response to NCDs, that cover NCD guidelines and access to essential medicines and technologies, for the four main NCDs (cardiovascular diseases, cancer, diabetes and chronic respiratory diseases), in addition to NCD risk factor targets.[3] To strengthen NCD services, the focus has been on increasing the use of evidence-based national guidelines/protocols/standards for the management of the four main NCDs through a primary care approach in the public sector; as well as provision of drug therapy, including glycaemic control, and counselling for eligible persons at high risk to prevent heart attacks and strokes, with emphasis on the primary care level. These interventions are based on a cost effectiveness analysis, that, together with risk factor reduction interventions, are expected to reduce premature NCD mortality.[4]

In the Americas region, where an estimated 240 million people are living with a chronic condition [5] health systems strengthening for NCDs has been a focus for the Pan American Health Organization (PAHO) Member States since the adoption of a regional NCD plan of action by the Ministries of Health in 2013.[6] Progress has been gradual and an assessment of the NCD plan of action, in 2020, noted that 17/35 countries (48.5%) had implemented a model of integrated management for NCDs, such as a chronic care model with evidence based guidelines, a clinical information system, self-care, community support, and multidisciplinary team-based care.[7] However, the COVID-19 pandemic subsequently has had a significant adverse impact on the Region, including a marked disruption of NCD services.

COVID-19 has been diagnosed in over 153 million people and led to more than 2.7 million deaths in the Region of the Americas, by the end of April 2022.[8] The importance of NCDs as factors leading to severe COVID-19 related illness or death is now well-documented, highlighting the importance of optimal NCD management.[9,10] However, the pandemic has negatively impacted NCD management, related to the extensive primary care disruptions. Two years into the pandemic, 93% (25/27 countries) of countries in the Americas have reported

1  
2  
3 disruptions in their essential primary care health services along the 66 tracer services in health  
4 systems (eg. cancer screening, diabetes management, hypertension management) .[11]  
5  
6

7 So to what extent have these health system disruptions affected NCD services? This article  
8 presents information to respond to the research question on what is the NCD service capacity and  
9 disruptions due to the COVID-19 pandemic, from the perspective of the health authorities  
10 responsible for the national NCD programs and services across the Region of the Americas.  
11  
12  
13

## 14 **METHODS**

15  
16  
17 This is a descriptive study, in which information on NCD services and disruptions resulting from  
18 the COVID-19 pandemic was extracted from the World Health Organization dataset on the NCD  
19 Country Capacity Surveys (CCS) 2019-2021, from the 35 Member States of the Pan American  
20 Health Organization. These are a diverse range of countries and to provide context to help situate  
21 the findings, the list of countries and selected characteristics are provided in Appendix 1 in  
22 supplemental information. The CCS is a closed, non-randomized, web-based survey using a  
23 standardized global methodology that collects information on, among other topics, NCD services  
24 (module 4), and on NCD service disruptions (module 5). An NCD service was described as  
25 health care encompassing front-line health service delivery (primary care) or higher-level  
26 services for any of the main NCDs. All statistical analyses were carried out using STATA 17  
27 software (Stata Corporation, 2017). P-values are not presented due to the descriptive  
28 characteristics of the study.  
29  
30  
31  
32  
33  
34  
35

36 Responses to the CCS were provided by the official Ministry of Health authorities responsible  
37 for the national NCD program, and submitted directly, using their unique access to the WHO  
38 CCS on-line tool. Data were then validated by PAHO/WHO, and in the event of any  
39 discrepancies or unanswered questions, feedback was sought from the designated Ministry of  
40 Health official.  
41  
42  
43  
44

45 The CCS was administered in March to June 2019; and from May to June 2020 module 5 was  
46 administered, with a response rate of 83% (29/35 countries). In 2021, the CCS was administered  
47 again from May to September 2021, with a 100% (35/35 countries) response rate.  
48  
49

50 Results presented are from all 35 countries from CCS 2021, and they are presented as a regional  
51 evaluation showing number and proportion of countries, without identifying countries, due to  
52 confidentiality agreements. A comparison of the impact of COVID-19 on NCD services in both  
53  
54  
55  
56  
57

years are presented, in which case data from the same 29 countries that responded to module 5 in both rounds (2020 and 2021) are presented.

### ***Patient and Public Involvement***

There is no patient involvement in this analysis.

## **RESULTS**

### ***Overall limited NCD service capacity in primary care***

For NCD service capacity, the CCS assesses the availability of evidence-based guidelines, essential medicines and technologies in primary care, cardiovascular disease risk stratification in clinical practice, and cancer screening and palliative care. Overall, NCD service capacity is rather limited in the Americas. Evidence-based national guidelines/protocols/standards for the four principal NCDs are available in only 63% (22/35) of countries, a slight improvement from 54% (19/35) in 2019. The most frequently available guidelines utilized in at least 50% of public health-care facilities were on diabetes (74%), hypertension (69%), cancer (60%) and chronic respiratory diseases (51%) (Appendix 2 in supplemental information). Only 29% of countries (10/35) offered cardiovascular risk stratification in clinical practice for the management of patients at high risk for heart attack and stroke in half or more of the primary health care facilities in the public sector.

Essential technologies for cardiovascular diseases (blood pressure measurement devices, total cholesterol measurement, and urine strips for albumin assay) are available in at least half of the health care facilities of the public health sector in 51% (18/35) of countries; and only 34% (12/35) of countries reported having all technologies available for diabetes (blood glucose measurement, oral glucose test, HbA1c test, dilated fundus examination, foot vibration perception by tuning fork, and urine strips for glucose and ketone measurement). This situation has not changed since 2019 (Table 1).

Essential medicines for cardiovascular diseases (aspirin, thiazide diuretics, ACE inhibitors, angiotensin II receptor blockers (ARBs) calcium channel blockers, beta blockers, and statins) were generally available in pharmacies in all almost all countries, with the exception of ARBs which are available in only 74% of countries (26/35). For diabetes, the essential medicines (insulin, metformin, sulphonylureas) are reported as being generally available in almost all countries and this situation has not changed since 2019. Regarding chronic respiratory diseases,

steroid inhalers and bronchodilators are available in 77% (27/35) and 89% (31/35) of countries, respectively. Nicotine replacement therapy for smoking cessation remains very limited in the region, with only 23% (8/35) of countries reporting availability. Oral morphine was also identified as an essential medicine which was not widely available in pharmacies, with around half of the countries (51%, 18/35 countries) reporting its availability (Table 1).

**Table 1:** Proportion of countries (%) with available basic NCD technologies and essential medicines in primary care facilities of the public health sector, Americas Region 2019-2021

|                                                 | Countries (%) |      |
|-------------------------------------------------|---------------|------|
|                                                 | 2019          | 2021 |
| <b>All basic NCD technologies*</b>              | 5             | 4    |
| Measuring weight                                | 100           | 97   |
| Measuring height                                | 100           | 100  |
| Blood glucose measurement                       | 94            | 94   |
| Oral glucose tolerance test                     | 63            | 69   |
| HbA1c test                                      | 51            | 54   |
| Dilated fundus examination                      | 37            | 51   |
| Foot vibration perception by tuning fork        | 43            | 51   |
| Urine strips for glucose and ketone measurement | 63            | 57   |
| Blood pressure measurement                      | 97            | 94   |
| Total cholesterol measurement                   | 77            | 71   |
| Urine strips for albumin assay                  | 60            | 54   |
| Peak flow measurement spirometry                | 31            | 17   |
| <b>All essential NCD medicines**</b>            | 17            | 20   |
| Insulin                                         | 83            | 91   |
| Aspirin (75/100 mg)                             | 94            | 91   |
| Metformin                                       | 94            | 100  |
| Thiazide diuretics                              | 91            | 89   |
| ACE inhibitors                                  | 91            | 89   |
| Angiotensin II receptor blockers (ARBs)         | 77            | 74   |
| Calcium channel blockers                        | 89            | 89   |
| Beta blockers                                   | 86            | 91   |
| Statins                                         | 83            | 86   |
| Oral morphine                                   | 49            | 51   |
| Steroid inhaler                                 | 77            | 77   |
| Bronchodilator                                  | 91            | 89   |
| Sulphonylurea(s)                                | 91            | 97   |
| Benzathine penicillin injection                 | 89            | 89   |
| Nicotin Replacement Therapy                     | 23            | 23   |

Range distribution of countries (%)

<25

Source: WHO NCD Country Capacity Survey, 2019-2021

Notes: \*Available in 50 or more of the public health care facilities. \*\* Available in 50 or more pharmacies.

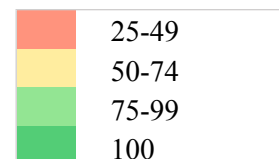

Cancer screening is offered in primary care in many countries in the Americas, with 63% (22/35 countries) reporting breast cancer screening; 83% (29/35) reporting cervical cancer screening; and 43% (15/35) of countries reporting colorectal cancer screening. Overall, only 43% of the countries (15/35) reported having a screening program for all three cancer types, and this situation had improved somewhat since 2019. Palliative care services to provide supportive and end-of-life care for people with cancer and other chronic conditions are offered in primary health care facilities in only 37% of countries (13/35) or community and home-based care in 46% of countries (16/35) and is yet another NCD service that requires strengthening.

### ***NCD service disruptions due to the Covid-19 pandemic***

NCD services were identified as part of the government's core set of essential health services to be maintained during the pandemic in 21 of 26 countries (81%). Nine countries (26%) reported allocating additional funding to NCDs in the government budget for the COVID-19 response (Table 2). Despite this, only 12/35 countries (34%) reported that outpatient NCD services were functioning normally and only 11% of countries (4/35) reported that no activities for NCDs had been postponed due to the pandemic (Figure 1). In 2021, three more countries reported that NCD outpatient services were functioning normally compared to 2020; while 3 fewer countries reported that NCD inpatient services were functioning normally (Appendix 3 in supplementary information).

Ministry of Health staff designated to work on NCD services were largely redirected to work on the COVID-19 response, either full- or part-time, reducing the human resources available to provide care for people with NCDs. Only 2 countries (6%, 2/35 countries) reported that no NCD staff had been redirected to support the COVID-19 effort. By 2021, this situation had worsened, with 14 countries reporting NCD staff were re-assigned to the pandemic, up from 11 countries in 2020 (Table 2).

**Table 2:** NCD service disruptions during the COVID-19 pandemic, Americas Region, 2020-2021

|                                                | Countries (%)            |                          | Comparison of countries (%)<br>in 2020 and in 2021 |                          |
|------------------------------------------------|--------------------------|--------------------------|----------------------------------------------------|--------------------------|
|                                                | 2021<br>(n=35 countries) | 2020<br>(n=29 countries) | 2020<br>(n=29 countries)                           | 2021<br>(n=29 countries) |
| <b>Redirected NCD resources</b>                |                          |                          |                                                    |                          |
| Staff reassigned/deployed to COVID-19 response |                          |                          |                                                    |                          |
| Some staff partially reassigned                | 40 (14/35)               | 38 (11/29)               | 48 (14/29)                                         |                          |

**Table 2:** NCD service disruptions during the COVID-19 pandemic, Americas Region, 2020-2021

|                                                                                             | Countries (%)               | Comparison of countries (%)<br>in 2020 and in 2021 |                          |
|---------------------------------------------------------------------------------------------|-----------------------------|----------------------------------------------------|--------------------------|
|                                                                                             | 2021<br>(n=35 countries)    | 2020<br>(n=29 countries)                           | 2021<br>(n=29 countries) |
|                                                                                             | Some staff fully reassigned | 26 (9/35)                                          | 21 (6/29)                |
| All staff partially reassigned                                                              | 20 (7/35)                   | 31 (9/29)                                          | 28 (8/29)                |
| All staff fully reassigned                                                                  | 6 (2/35)                    | 7 (2/29)                                           | 7 (2/29)                 |
| No staff reassigned                                                                         | 6 (2/35)                    | 3 (1/29)                                           | 7 (2/29)                 |
| Don't know                                                                                  | 3 (1/35)                    | 0 (0/29)                                           | 3 (1/29)                 |
| <b>Government NCD funds allocated to support COVID-19 response</b>                          |                             |                                                    |                          |
| None or not yet                                                                             | 29 (10/35)                  | 59 (17/29)                                         | 31 (9/29)                |
| Don't know                                                                                  | 49 (17/35)                  | 34 (10/29)                                         | 48 (14/29)               |
| 1-25%                                                                                       | 14 (5/35)                   | 0 (0/29)                                           | 10 (3/29)                |
| 26-50%                                                                                      | 3 (1/35)                    | 0 (0/29)                                           | 3 (1/29)                 |
| 51-75%                                                                                      | 6 (2/35)                    | 3 (1/29)                                           | 7 (2/29)                 |
| 76-100%                                                                                     | 0 (0/35)                    | 3 (1/29)                                           | 0 (0/29)                 |
| <b>NCD services included in COVID-19 response</b>                                           |                             |                                                    |                          |
| NCD services included as part of the list of essential health services in the COVID-19 plan |                             |                                                    |                          |
| Cardiovascular disease services                                                             | 95 (20/21)                  | N/A                                                | N/A                      |
| Cancer services                                                                             | 86 (18/21)                  | N/A                                                | N/A                      |
| Diabetes services                                                                           | 100 (21/21)                 | N/A                                                | N/A                      |
| Chronic respiratory disease services                                                        | 86 (12/21)                  | N/A                                                | N/A                      |
| Chronic kidney disease and dialysis services                                                | 0 (0/35)                    | N/A                                                | N/A                      |
| Tobacco cessation services                                                                  | 48 (10/21)                  | N/A                                                | N/A                      |
| Other                                                                                       | 14 (3/21)                   | N/A                                                | N/A                      |
| Additional funding allocated for NCDs                                                       | 26 (9/35)                   | 10 (3/29)                                          | 10 (3/29)                |
| <b>NCD activities postponed due to COVID-19 pandemic</b>                                    |                             |                                                    |                          |
| None                                                                                        | 11 (4/35)                   | 17 (5/29)                                          | 10 (3/29)                |
| Implementation of NCD Surveys                                                               | 40 (14/35)                  | 55 (16/29)                                         | 45 (13/29)               |
| Public screening programs for NCDs                                                          | 51 (18/35)                  | 45 (13/29)                                         | 48 (14/29)               |
| WHO PEN package implementation <sup>1</sup>                                                 | 23 (8/35)                   | 21 (6/29)                                          | 24 (7/29)                |
| WHO HEARTS package <sup>2</sup> implementation                                              | 29 (10/35)                  | 31 (9/29)                                          | 31 (9/29)                |
| Mass communication campaigns                                                                | 34 (12/35)                  | 24 (7/29)                                          | 34 (10/29)               |
| Other                                                                                       | 11 (4/35)                   | 24 (7/29)                                          | 10 (3/29)                |

Source: WHO NCD Country Capacity Survey, 2019-2021

Note: Round 1 (R1) conducted in 2020 and Round 2 (R2) conducted in 2021.

N/A – not applicable, data for comparison not available between 2020 and 2021.

Regarding service disruptions, outpatient NCD services were suspended in 1 country, community NCD services were suspended in 4 countries and mobile NCD clinics were

<sup>1</sup> WHO PEN package is a set of essential primary care interventions for the main NCDs, and can be found here: <https://www.who.int/publications/i/item/9789240009226>

<sup>2</sup> WHO Hearts package is the primary care interventions to improve hypertension diagnosis, treatment and control and can be found here: <https://www.who.int/publications/i/item/9789240001367>

1  
2  
3 suspended in 6 countries. The majority of countries reported limited access to outpatient  
4 services (19/35 countries, 54%), and to inpatient NCD services (19/35 countries, 54%) (Figure  
5 1).  
6  
7

8  
9 The disruption in NCD services, either partially or completely, affected all types of care for  
10 people with NCDs, but more so for diabetes and hypertension services (Figure 2, and Appendix  
11 4 in supplementary information). The main reasons cited for disruption of NCD services related  
12 to human resources, where 17 countries (74%, 17/24 countries) reported it was due to NCD staff  
13 deployed to the COVID response, or simply insufficient clinical staff to provide the service  
14 (46%, 11/24 countries). Two countries (8%, 2/24 countries) noted clinical staff did not have  
15 personal protective equipment which affected service provision. Six countries (25%, 6/24  
16 countries) reported stock out of essential NCD medicines and or diagnostics at the health facility  
17 level which affected service continuity. Inpatient NCD services were mainly disrupted due to  
18 the cancellation of elective procedures (63%, 15/24 countries), and hospital beds or inpatient  
19 service were simply not available in 46% of countries (11/24 countries). The extent of  
20 disruptions for NCD services worsened in 2021, as compared to the situation in 2020 for all  
21 types of NCD services (Figure 2).  
22  
23  
24  
25  
26  
27  
28

29 Beyond service disruption, planned NCD activities have been suspended or postponed due to the  
30 COVID-19 pandemic, and only small improvements over time were observed (Table 2). The  
31 activities most commonly reported as suspended were screening people for cancer, diabetes and  
32 other NCDs in 51% of the countries (18/35 countries), the implementation of NCD surveys,  
33 where 14 countries (40%) report postponing surveys and the implementation of the Hearts  
34 technical package was suspended or postponed in 10 countries.  
35  
36  
37  
38

39 Perhaps the more influential driver of NCD service disruptions, however, is on the demand side,  
40 where COVID-19 lock down measures and fear or mistrust with community transmission led to  
41 many people not seeking care or patients not presenting for care, as reported in 18 countries and  
42 17 countries, respectively (75%, 18/24 countries; 71% 17/24 countries). Financial difficulties  
43 (46% 11/24 countries) and travel restrictions hindering people's access to health facilities (50%,  
44 12/24 countries) were also cited as important causes of disrupted NCD services.  
45  
46  
47  
48

### 49 ***Strategies and plans to mitigate NCD service disruptions***

50  
51  
52 Many different approaches were employed to minimize the disruption in NCD services during  
53 the pandemic which did not change over 2020-2021: home-based care, triage patients and  
54 prioritize care based on severity of condition, and support for self-care were most commonly  
55  
56  
57



1  
2  
3 reported (Figure 3). Telemedicine was employed to replace in person consultations (16/24  
4 countries, 67%) and this was sustained over time (Appendix 5 in supplementary information).  
5  
6

7 When prompted on plans to reinitiate disrupted NCD services, most respondents indicated that  
8 the priority was to train health care professionals in NCD diagnosis and treatment, re-initiate  
9 cancer screening services, continue use of recurring medicine prescription and continue the use  
10 of telemedicine.  
11  
12  
13

14 Respondents also identified their immediate needs to assist with building stronger health services  
15 for NCDs. The main needs identified were guidelines for NCD and COVID-19 clinical  
16 management; guidance on promoting healthy lifestyles especially post COVID-19 to motivate  
17 behaviour change; extension of telemedicine services to facilitate continuous communication  
18 with patients especially those living in remote areas or large distances from health facilities;  
19 systems for tracking patients with NCDs including Apps that can better support self-  
20 management; and rehabilitation services for those people suffering long term symptoms from  
21 COVID-19 including respiratory symptoms.  
22  
23  
24  
25  
26

## 27 **DISCUSSION**

28  
29  
30 This is the only region-wide survey in the Americas, that has systematically measured the NCD  
31 service capacity, the disruption of NCD services due to the COVID-19 pandemic, as well as the  
32 mitigation strategies used to ensure continuity of services. More than half of the countries in the  
33 region do not have the comprehensive package of guidelines, technologies and medicines for all  
34 four major NCDs and there was little reported change between 2019 and 2021 on the NCD  
35 service capacity. Nonetheless, the Americas region has been noted to have among the higher  
36 levels of NCD service capacity as compared to the other World regions [12]; and a much greater  
37 NCD service capacity than as reported in a similar survey conducted in primary care centers in  
38 India.[13]  
39  
40  
41  
42  
43  
44

45 The findings from this regional survey suggest significant and sustained disruptions, affecting all  
46 countries regardless of the country's level of investments in health care or NCD burden. This  
47 situation appears to be consistent with the situation reported in other regions of the  
48 World.[12,14-16]  
49  
50  
51

52 To assist governments in maintaining essential NCD services at this time, PAHO/WHO has  
53 published guidelines to assist with triaging patients, utilize telemedicine and multi-month  
54 prescriptions more broadly, and reorganize oncology services.[17] The extent of use or  
55  
56  
57

1  
2  
3 application of these guidelines is not known, although the results of this survey indicate that  
4 many national NCD program managers had use for the guidance on maintaining essential NCD  
5 services.  
6  
7

8  
9 More research is needed to document the extent, and consequences of NCD service disruption in  
10 the Americas region. Further research is also needed to better understand how effective the  
11 mitigation strategies of triaging patients, e-prescriptions and telemedicine, were as substitution  
12 for face-to-face encounters; and whether inequities in access to primary NCD services were  
13 further exacerbated by the NCD service disruptions.  
14  
15

16  
17 Some of this research has begun in the region. For example, a survey of NCD patient advocacy  
18 organizations in Latin America, noted the dissatisfaction and poorer quality of care during 2020-  
19 2021, where 52% of respondents experienced delays of 30 days or more for primary care;  
20 telemedicine was reported as not accessible to patients by 37% of respondents and a majority  
21 (76%) of NCD patients faced challenges with refilling prescription medication.[18] In Mexico,  
22 the social security system, IMSS, noted reduced screening for breast and cervical cancer (−79%  
23 and −68%), diabetes and hypertension care (−32% in both), attributed to underfunding, shortages  
24 in human resources and reallocation of health staff and infrastructure due to COVID-19.[19]  
25  
26  
27  
28  
29

30  
31 Similarly in the USA, cancer screening declined sharply in 2020 compared with 2019, (breast,  
32 −90.8%; colorectal, −79.3%; prostate, −63.4%) and breast cancer diagnosis has been observed  
33 to decrease during the pandemic.[20-21] The USA has also been noted to have the highest  
34 absolute number of excess deaths in 2020 (458,000) as compared to 29 other countries.[22] A  
35 large excess death rate of 64% more deaths in 2020 than 2019 were also reported in Ecuador,  
36 where it was found that indigenous populations had four times the excess death rate of the  
37 majority mestizo group, indicating unequal impact of COVID on vulnerable populations.[23]  
38  
39  
40  
41

42 Brazil has also reported significant declines in utilization of primary care services by people with  
43 NCDs [24], and in one state almost a third of people living with NCDs reported impaired  
44 management of their NCD as a result of the COVID-19 restrictions.[25] Brazil has also noted  
45 excess deaths from cancer and cardiovascular diseases related to the COVID-19 pandemic.[26]  
46 The full extent of foregone care, however are yet to be observed, and more research is needed  
47 throughout countries in the Americas region, to determine the impact of NCD service disruptions  
48 on diagnosis, treatment and health outcomes for people with NCDs. For example, in the USA,  
49 cancer mortality is expected to increase due to reduced screening and early diagnosis [20], and in  
50 the U.K., a substantial increase in cancer deaths and morbidity have been predicted due to  
51 COVID-19 restrictions.[27-29]  
52  
53  
54  
55  
56  
57

1  
2  
3 Improving NCD service capacity and NCD management is tied closely to universal health  
4 coverage and primary care strengthening. As a way forward, the Americas region has charted a  
5 path for creating more resilient health services, which includes strengthening primary care and  
6 increasing financial investments in health systems.[30] And as COVID-19 cases continue to  
7 decline and health services resume to capacity, the public health priority now needs to be on  
8 improving the equitable access to NCD diagnosis and treatment in primary care, which includes  
9 updating NCD guidelines, training multi-disciplinary health care teams, increasing access to  
10 essential NCD medicines and technologies, improving self-management support, among  
11 others.[31] With regards to NCD medicines and technologies, governments in the Americas  
12 region can utilize the PAHO Strategic Fund which offers a useful mechanism for pooled  
13 procurement of quality assured essential NCD medicines and technologies, and was successfully  
14 deployed in government responses to COVID-19, and other health priorities.[32]

## 21 22 CONCLUSIONS

23  
24  
25 This analysis documents the limitations in NCD service capacity in the Americas region, and the  
26 degree of disruptions in access to essential NCD services and medicines. While there is limited  
27 published data on the impact that these service disruptions will have on health outcomes, given  
28 the significant number of people with NCDs in the Americas, the limited NCD service capacity  
29 and extensive disruptions in NCD services from the COVID-19 pandemic, the priority must now  
30 be strengthening primary care services for NCDs and addressing the backlog and foregone care  
31 for NCD management.  
32  
33  
34  
35  
36  
37  
38  
39  
40

41 **Figure 1:** Proportion of countries (%) with disruptions in NCD services during the COVID-19  
42 pandemic, Americas region, 2020-2021  
43

44  
45 **Figure 2:** Proportion of countries (%) with NCD Service Disruptions by Service Type due to the  
46 COVID-19 pandemic, Americas Region, 2020-2021  
47

48  
49 **Figure 3:** Proportion of countries (%) with approaches employed to overcome NCD service  
50 disruptions due to COVID-19 Pandemic, Americas Region, 2020-2021  
51  
52  
53  
54  
55  
56  
57

1  
2  
3 **Contributor statement:** SL and RC conceived the original idea. RC, CC, DO collected and  
4 analyzed the data. SL, RC, CC, DO, AH interpreted the results. SL wrote the paper, RC, CC,  
5 DO, AH reviewed and contributed to the paper. SL, RC, CC, DO, AH approved the final version.  
6

7  
8 **Competing interests:** None  
9

10 **Funding:** None  
11

12 **Data sharing statement:** Data reported in this analysis are from the WHO NCD Country  
13 Capacity Survey and available in the WHO Global Health Observatory. Data from the Americas  
14 region are available upon reasonable request (deidentified data by country) from PAHO/WHO  
15 per request at: [nmhsurveillance@paho.org](mailto:nmhsurveillance@paho.org)  
16  
17

18 **Ethics statement:** This study does not involve human participants and ethical approval was not  
19 required.  
20

21  
22 **Patient and public involvement statement:** It was not appropriate or possible to involve  
23 patients or the public in the design, or conduct, or reporting, or dissemination plans of this  
24 analysis which involved data collection and analysis from information provided by the Ministry  
25 of Health national NCD program managers in the Americas region.  
26  
27  
28  
29  
30  
31  
32  
33  
34  
35  
36  
37  
38  
39  
40  
41  
42  
43  
44  
45  
46  
47  
48  
49  
50  
51  
52  
53  
54  
55  
56  
57  
58  
59  
60

## REFERENCES

1. United Nations. Political Declaration of the High-level Meeting on Universal Health Coverage “Universal health coverage: moving together to build a healthier world”. New York: UN; 2019. Accessed April 8, 2022: <https://www.un.org/pga/73/wp-content/uploads/sites/53/2019/07/FINAL-draft-UHC-Political-Declaration.pdf>
2. World Health Organization. Global Action Plan for the Prevention and Control of NCDs 2013-2020. Geneva:WHO; 2013. Accessed April 8, 2022: <https://www.who.int/publications/i/item/9789241506236>
3. World Health Organization. NCD Global Monitoring Framework. Indicator Definitions and Specifications. Geneva:WHO; 2014. Accessed April 8, 2022: <https://www.who.int/publications/m/item/noncommunicable-diseases-global-monitoring-framework-indicator-definitions-and-specifications>
4. World Health Organization. Tackling NCDs Best Buys. Best buys and other recommended interventions for the prevention and control of noncommunicable diseases. Geneva:WHO; 2017. Accessed April 25 2022: <https://apps.who.int/iris/bitstream/handle/10665/259232/WHO-NMH-NVI-17.9-eng.pdf>
5. Clark A, Jit M, Warren-Gash C, Guthrie B, Wang HHX, Mercer SW, et al. Global, regional, and national estimates of the population at increased risk of severe COVID-19 due to underlying health conditions in 2020: a modelling study. *Lancet Glob Heal* 2020;8(8):e1003-e1017.
6. Pan American Health Organization. Plan of action for the prevention and control of noncommunicable diseases. Washington, DC: PAHO; 2014. Accessed April 8, 2022: <https://iris.paho.org/handle/10665.2/35009>
7. Pan American Health Organization. Plan of Action for the Prevention and Control of Noncommunicable Diseases: Final Report. Washington, DC:PAHO; 2020. Accessed April 8, 2022: <https://www.paho.org/en/documents/cd58inf6-plan-action-prevention-and-control-noncommunicable-diseases-final-report>
8. Pan American Health Organization. PAHO COVID-19 Dashboard Washington, D.C.: PAHO; 2022. Accessed May 2, 2022: <https://ais.paho.org/hip/viz/COVID19Table.asp>
9. Azarpazhooh MR, Morovatdar N, Avan A, Phan TG, Divani AA, Yassi N, et al. COVID-19 Pandemic and Burden of Non-Communicable Diseases: An Ecological Study on Data of 185 Countries. *J Stroke Cerebrovasc Dis*. 2020;29(9):105089.
10. Chang AY, Cullen MR, Harrington RA, Barry M. The impact of novel coronavirus COVID-19 on noncommunicable disease patients and health systems: a review. *J Intern Med* 2021; 289: 450–462.

11. World Health Organization. Third round of the global pulse survey on continuity of essential health services during the COVID-19 pandemic. Geneva:WHO; 2021. Accessed April 10, 2022: [https://www.who.int/publications/i/item/WHO-2019-nCoV-EHS\\_continuity-survey-2022](https://www.who.int/publications/i/item/WHO-2019-nCoV-EHS_continuity-survey-2022)
12. World Health Organization. Rapid assessment of service delivery for NCDs during the COVID-19 pandemic. Geneva: WHO; 2020. Accessed April 8 2022: <https://www.who.int/publications/m/item/rapid-assessment-of-service-delivery-for-ncds-during-the-covid-19-pandemic>
13. Krishnan A, Mathur P, Kulothungan V, Salve HR, Leburu S, Amarchand R, et al. Preparedness of primary and secondary health facilities in India to address major noncommunicable diseases: results of a National Noncommunicable Disease Monitoring Survey (NNMS). *BMC Health Serv Res.* 2021;21(1):757.
14. Dyer O. Covid-19: Pandemic is having “severe” impact on non-communicable disease care, WHO survey finds. *BMJ* 2020; 369:m2210.
15. Suva MA, Suvarna VR, Mohan V. Impact of COVID-19 on Noncommunicable Diseases. *J Diabetol* 2020;12(3):252-256.
16. Ágh T, van Boven JFM, Wettermark B, Menditto E, Pinnock H, Tsiligianni I, et al. A Cross-Sectional Survey on Medication Management Practices for Noncommunicable Diseases in Europe During the Second Wave of the COVID-19 Pandemic. *Front. Pharmacol.* 2021;12:685696.
17. Pan American Health Organization. Maintaining Essential Services for People with Noncommunicable Diseases. 2020. Accessed April 28, 2022: <https://iris.paho.org/handle/10665.2/52493>
18. Kruse MH, Durstine A, Evans DP. Effect of COVID-19 on patient access to health services for noncommunicable diseases in Latin America: a perspective from patient advocacy organizations. *Int J Equity Health.* 2022Apr2;21(1):45.
19. Doubova SV, Robledo-Aburto ZA, Duque-Molina C, Borrayo-Sánchez G, González-León M, Avilés-Hernández R, et al. Overcoming disruptions in essential health services during the COVID-19 pandemic in Mexico. *BMJ Global Health* 2022;7:e008099.
20. Chen RC, Haynes K, Du S, Barron J, Katz AJ. Association of Cancer Screening Deficit in the United States With the COVID-19 Pandemic. *JAMA Oncol.* 2021;7(6):878-884.
21. Kang YJ, Baek JM, Kim YS, Jeon YW, Yoo TK, Rhu J, et al. Impact of the COVID-19 Pandemic on the Diagnosis and Surgery of Breast Cancer: A Multi-Institutional Study. *J Breast Cancer.* 2021;24(6):491-503.

22. Islam N, Shkolnikov VM, Acosta RJ, Klimkin I, Kawachi I, Irizarry RA, et al. Excess deaths associated with Covid-19 pandemic in 2020: age and sex disaggregated time series analysis in 29 high income countries. *BMJ*. 2021;373:n1137.
23. Cuéllar L, Torres I, Romero-Severson E, Mahesh R, Ortega N, Pungitore S, et al. Excess deaths reveal unequal impact of COVID-19 in Ecuador. *BMJ Glob Health*. 2021;6(9).
24. Malta DC, Gomes CS, Silva AGD, Cardoso LSM, Barros MBA, Lima MG, et al. Use of health services and adherence to social distancing by adults with Noncommunicable Diseases during the COVID-19 pandemic, Brazil, 2020. *Cien Saude Colet*. 2021;26(7):2833-42.
25. Leite JS, Feter N, Caputo EL, Doring IR, Cassuriaga J, Reichert FF, et al. Managing noncommunicable diseases during the COVID-19 pandemic in Brazil: findings from the PAMPA cohort. *Cien Saude Colet*. 2021;26(3):987-1000.
26. Jardim B, Migowski A, Corrêa FM, et al. Covid-19 in Brazil in 2020: impact on deaths from cancer and cardiovascular diseases. *Rev Saude Publica*. 2022 Apr 22;56:22.
27. Sud A, Torr B, Jones ME, et al. Effect of delays in the 2-week-wait cancer referral pathway during the COVID-19 pandemic on cancer survival in the UK: a modelling stud. *Lancet Oncol* 2020; 21: 1035–44.
28. Maringe C, Spicer J, Morris M, et al. The impact of the COVID-19 pandemic on cancer deaths due to delays in diagnosis in England, UK: a national, population-based, modelling study. *Lancet Oncol*. 2020 Aug; 21(8): 1023–1034.
29. Lai A, Pasea L, Banerjee A, Hall G, Denaxas S, Chang WH, et al. Estimated impact of the COVID-19 pandemic on cancer services and excess 1-year mortality in people with cancer and multimorbidity: near real-time data on cancer care, cancer deaths and a population-based cohort study. *BMJ Open* 2020;10:e043.
30. Etienne CF, Fitzgerald J, Almeida G, Birmingham ME, Brana M, Bascolo E. COVID-19: transformative actions for more equitable, resilient, sustainable societies and health systems in the Americas. *BMJ Glob Health*. 2020;5:e003509.
31. Luciani S, Agurto I, Caixeta R, Hennis A. Prioritizing Noncommunicable Diseases in the Americas Region in the Era of Covid-19. *PAHO J Pub Hlth*; 2022: in press.
32. Lal A, Lim C, Almeida G, Fitzgerald J. Minimizing COVID-19 disruption: Ensuring the supply of essential health products for health emergencies and routine health services. *The Lancet Regional Health – Americas*. 2022;6:100129.

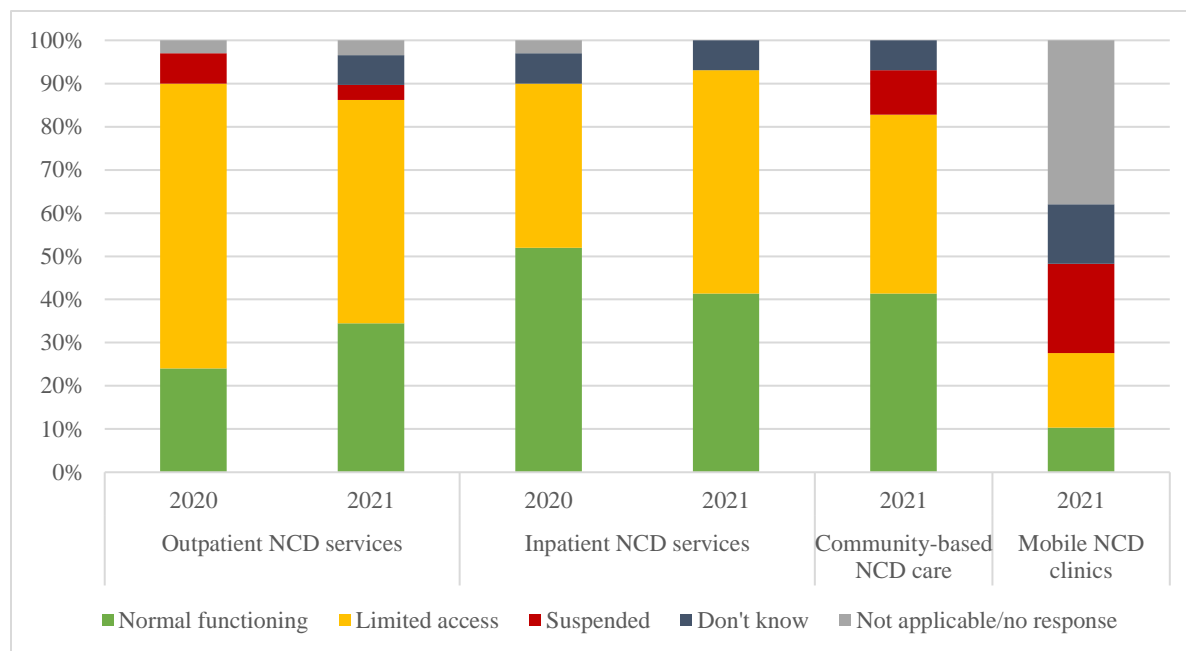

**Figure 1:** Proportion of countries (%) with disruptions in NCD services during the COVID-19 pandemic, Americas region, 2020-2021



1  
2  
3  
4  
5  
6  
7  
8  
9  
10  
11  
12  
13  
14  
15  
16  
17  
18  
19  
20  
21  
22  
23  
24  
25  
26  
27  
28  
29  
30  
31  
32  
33  
34  
35  
36  
37  
38  
39  
40  
41  
42  
43  
44  
45  
46  
47  
48  
49  
50  
51  
52  
53  
54  
55  
56  
57  
58  
59  
60

For peer review only

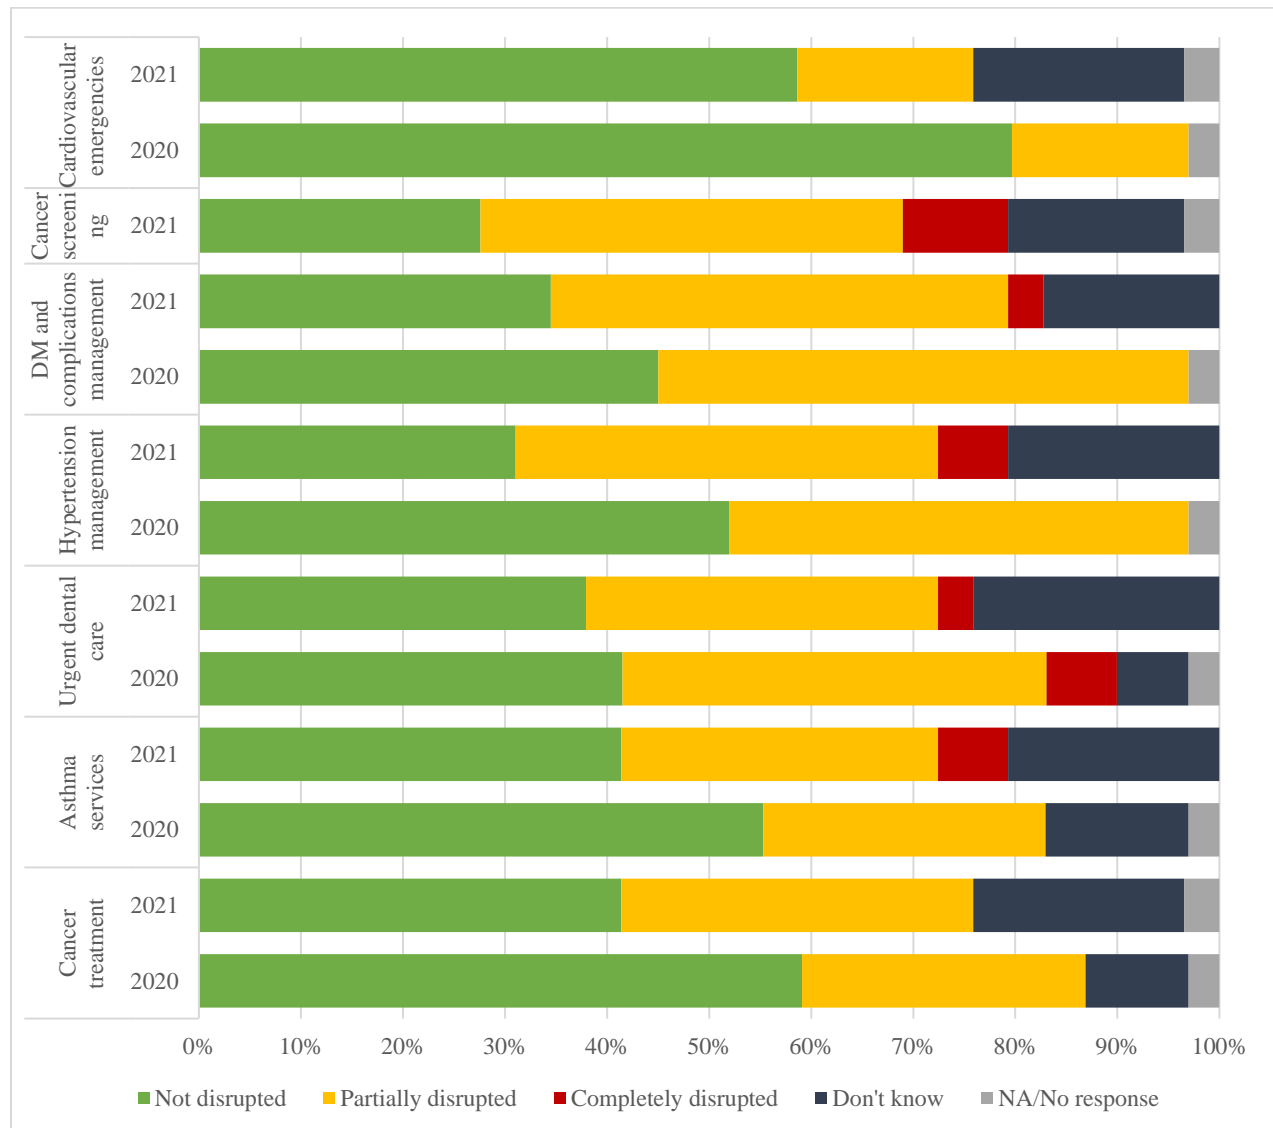

**Figure 2:** Proportion of countries (%) with NCD Service Disruptions by Service Type due to the COVID-19 pandemic, Americas Region, 2020-2021

Abbreviations: N/A: not applicable, country does not provide the service. DM: diabetes mellitus. Notes: cancer screening was not included in the 2020 survey. Cardiovascular emergencies include myocardial infarctions, stroke, and cardiac arrhythmias.

1  
2  
3  
4  
5  
6  
7  
8  
9  
10  
11  
12  
13  
14  
15  
16  
17  
18  
19  
20  
21  
22  
23  
24  
25  
26  
27  
28  
29  
30  
31  
32  
33  
34  
35  
36  
37  
38  
39  
40  
41  
42  
43  
44  
45  
46  
47  
48  
49  
50  
51  
52  
53  
54  
55  
56  
57  
58  
59  
60

For peer review only

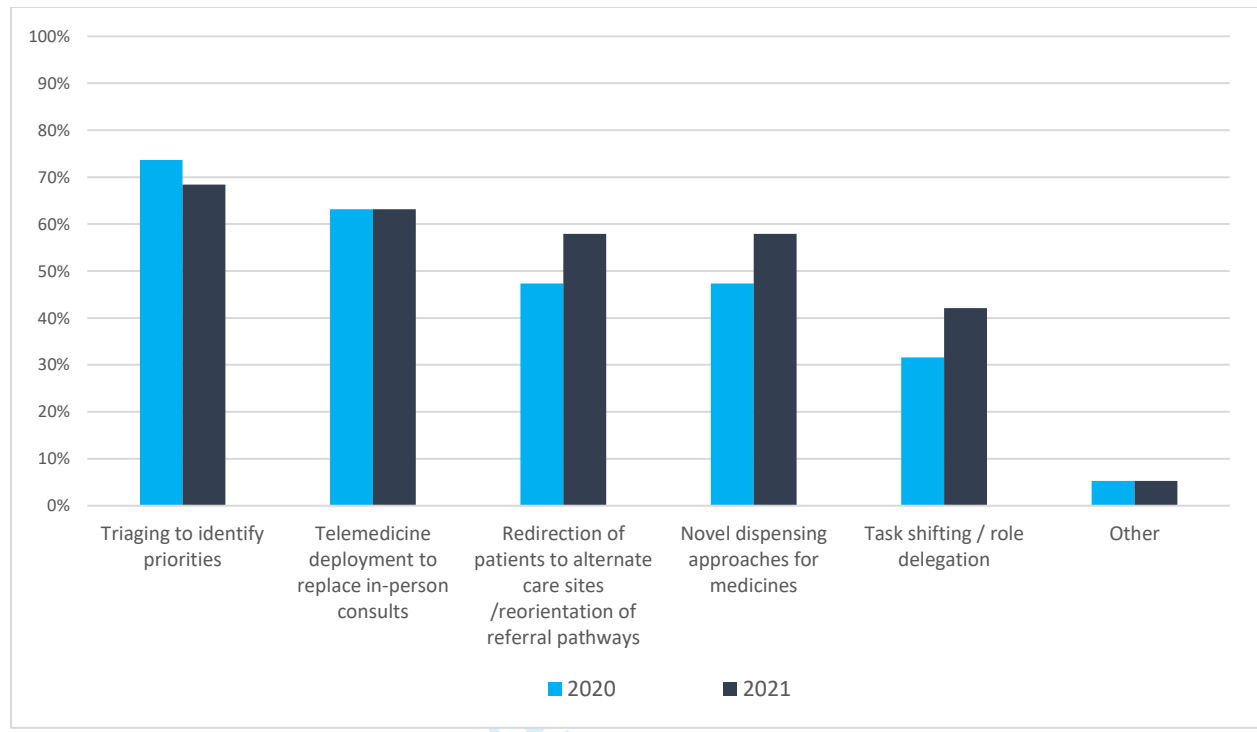

**Figure 3:** Proportion of countries (%) with approaches employed to overcome NCD service disruptions due to COVID-19 Pandemic, Americas Region, 2020-2021

## Supplemental material

|                                                                                                                                                                |   |
|----------------------------------------------------------------------------------------------------------------------------------------------------------------|---|
| <b>Appendix 1.</b> Countries of the Americas region included in the analysis.....                                                                              | 2 |
| <b>Appendix 2:</b> Availability of guidelines/protocols for the management of NCDs, referred by national NCD programs. Region of the Americas, 20019-2021..... | 3 |
| <b>Appendix 3.</b> Access to NCD services during the COVID-19 pandemic. Americas region, 2020-2021.....                                                        | 4 |
| <b>Appendix 4.</b> NCD service disruption due to COVID-19. Region of the Americas, 2021 results..                                                              | 5 |
| <b>Appendix 5.</b> Approaches employed to overcome NCD service disruptions due to COVID-19 Pandemic. Americas Region, 2020-2021.....                           | 6 |

**Appendix 1.** Countries of the Americas region included in the analysis

| Country                                             | Population (thousands) | Public health expenditure as % of GDP | NCD Mortality Rate (age-adjusted per 100 000 pop) |
|-----------------------------------------------------|------------------------|---------------------------------------|---------------------------------------------------|
| <b>Northern America</b>                             |                        |                                       |                                                   |
| Canada                                              | 38,067.90              | 7.9                                   | 302                                               |
| United States of America                            | 332,915.10             | 8.5                                   | 408                                               |
| <b>Mexico, Central America, and Latin Caribbean</b> |                        |                                       |                                                   |
| Belize                                              | 404.9                  | 3.9                                   | 452                                               |
| Costa Rica                                          | 5,139.10               | 5.5                                   | 310                                               |
| Cuba                                                | 11,317.50              | 9.9                                   | 431                                               |
| Dominican Republic                                  | 10,953.70              | 2.5                                   | 508                                               |
| El Salvador                                         | 6,518.50               | 4.5                                   | 393                                               |
| Guatemala                                           | 18,249.90              | 2.1                                   | 498                                               |
| Honduras                                            | 10,063.00              | 2.8                                   | 615                                               |
| Mexico                                              | 130,262.20             | 2.7                                   | 466                                               |
| Nicaragua                                           | 6,702.40               | 5.1                                   | 548                                               |
| Panama                                              | 4,381.60               | 4.6                                   | 335                                               |
| <b>South America</b>                                |                        |                                       |                                                   |
| Argentina                                           | 45,605.80              | 5.9                                   | 436                                               |
| Bolivia                                             | 11,832.90              | 4.5                                   | 584                                               |
| Brazil                                              | 213,993.40             | 4                                     | 425                                               |
| Chile                                               | 19,212.40              | 4.6                                   | 329                                               |
| Colombia                                            | 51,265.80              | 5.5                                   | 327                                               |
| Ecuador                                             | 17,888.50              | 4.2                                   | 365                                               |
| Peru                                                | 33,359.40              | 3.3                                   | 304                                               |
| Paraguay                                            | 7,219.60               | 2.9                                   | 448                                               |
| Uruguay                                             | 3,485.20               | 6.7                                   | 446                                               |
| Venezuela                                           | 28,704.90              | 1.7                                   | 412                                               |
| <b>Non-Latin Caribbean</b>                          |                        |                                       |                                                   |
| Antigua and Barbuda                                 | 98.70                  | 2.9                                   | 502                                               |
| Bahamas                                             | 396.90                 | 3.1                                   | 533                                               |
| Barbados                                            | 287.70                 | 2.9                                   | 477                                               |
| Dominica                                            | 74.30                  | 4.3                                   | .                                                 |
| Grenada                                             | 113.00                 | 1.7                                   | 619                                               |
| Guyana                                              | 790.30                 | 3.7                                   | 802                                               |
| Haiti                                               | 11,541.70              | 0.9                                   | 839                                               |
| Jamaica                                             | 2,973.50               | 3.9                                   | 455                                               |
| Saint Kitts and Nevis                               | 54.20                  | 2.5                                   | .                                                 |
| Saint Lucia                                         | 184.40                 | 2.1                                   | 516                                               |
| Saint Vincent and the Grenadines                    | 111.30                 | 3.1                                   | 537                                               |
| Suriname                                            | 591.80                 | 5.3                                   | 666                                               |
| Trinidad and Tobago                                 | 1,403.40               | 3.4                                   | 439                                               |

Source: PAHO Core Indicators, 2022

**Appendix 2:** Availability of guidelines/protocols for the management of NCDs, referred by national NCD programs. Region of the Americas, 20019-2021

| NCD guidelines/protocols                           | Hypertension |      | Diabetes |      | Cancer |      | Chronic respiratory |      | NCD4 Guidelines/protocols |      |
|----------------------------------------------------|--------------|------|----------|------|--------|------|---------------------|------|---------------------------|------|
|                                                    | 2019         | 2021 | 2019     | 2021 | 2019   | 2021 | 2019                | 2021 | 2019                      | 2021 |
| Availability                                       | 86%          | 89%  | 97%      | 97%  | 77%    | 89%  | 66%                 | 71%  | 54%                       | 63%  |
| Utilized in at least 50% of health care facilities | 73%          | 69%  | 74%      | 74%  | 70%    | 60%  | 74%                 | 51%  | 34%                       | 40%  |
| Last time updated                                  |              |      |          |      |        |      |                     |      |                           |      |
| last 5 years                                       | 23%          | 46%  | 46%      | 63%  | 26%    | 31%  | 14%                 | 17%  | .                         | .    |
| 6 to 10 years                                      | 40%          | 26%  | 23%      | 11%  | 34%    | 29%  | 23%                 | 23%  | .                         | .    |
| >10 years                                          | 20%          | 11%  | 23%      | 14%  | 14%    | 23%  | 20%                 | 26%  | .                         | .    |
| Includes referral criteria                         | 77%          | 77%  | 82%      | 89%  | 85%    | 80%  | 78%                 | 60%  | 37%                       | 49%  |

Source: WHO NCD Country Capacity Survey, 2019-2021.

**Appendix 3.** Access to NCD services during the COVID-19 pandemic. Americas region, 2020-2021

| NCD services               | Countries R2 (%)         | Same countries R1 and R2 (%) |                          |
|----------------------------|--------------------------|------------------------------|--------------------------|
|                            | 2021<br>(n=35 countries) | 2020<br>(n=29 countries)     | 2021<br>(n=29 countries) |
| Outpatient NCD services    |                          |                              |                          |
| Functioning as normal      | 34% (12/35)              | 24% (7/29)                   | 34% (10/29)              |
| Limited access             | 54% (19/35)              | 66% (19/29)                  | 52% (15/29)              |
| Suspended                  | 3% (1/35)                | 7% (2/29)                    | 3% (1/29)                |
| Don't know                 | 6% (2/35)                | 0% (2/29)                    | 7% (2/29)                |
| Not applicable/No response | 3% (1/35)                | 3% (1/29)                    | 3% (1/29)                |
| Inpatient NCD services     |                          |                              |                          |
| Functioning as normal      | 40% (14/35)              | 52% (15/29)                  | 41% (12/29)              |
| Limited access             | 54% (19/35)              | 38% (11/29)                  | 52% (15/29)              |
| Suspended                  | 0% (2/35)                | 0% (0/29)                    | 0% (0/29)                |
| Don't know                 | 6% (2/35)                | 7% (2/29)                    | 7% (2/29)                |
| Not applicable/No response | 0% (2/35)                | 3% (1/29)                    | 0% (2/29)                |
| Community-based NCD care   |                          |                              |                          |
| Functioning as normal      | 37% (13/35)              | N/A                          | 41% (12/29)              |
| Limited access             | 43% (15/35)              | N/A                          | 41% (12/29)              |
| Suspended                  | 11% (4/35)               | N/A                          | 10% (3/29)               |
| Don't know                 | 6% (2/35)                | N/A                          | 7% (2/29)                |
| Not applicable/No response | 3% (1/35)                | N/A                          | 0% (2/29)                |
| Mobile NCD clinics         |                          |                              |                          |
| Functioning as normal      | 11% (4/35)               | N/A                          | 10% (3/29)               |
| Limited access             | 23% (8/35)               | N/A                          | 17% (5/29)               |
| Suspended                  | 17% (6/35)               | N/A                          | 21% (6/29)               |
| Don't know                 | 14% (5/35)               | N/A                          | 14% (4/29)               |
| Not applicable/No response | 34% (12/35)              | N/A                          | 38% (11/29)              |

Source: WHO NCD Country Capacity Survey, 2019-2021

Note: Round 1 (R1) conducted in 2020 and Round 2 (R2) conducted in 2021.

N/A – not applicable, data for comparison not available between 2020 and 2021.



**Appendix 4.** NCD service disruption due to COVID-19. Region of the Americas, 2021 results.

1  
2  
3  
4  
5  
6  
7  
8  
9  
10  
11  
12  
13  
14  
15  
16  
17  
18  
19  
20  
21  
22  
23  
24  
25  
26  
27  
28  
29  
30  
31  
32  
33  
34  
35  
36  
37  
38  
39  
40  
41  
42  
43  
44  
45  
46  
47

| Disruption level     | Hypertension management |         | Cardio-vascular emergencies |         | Cancer screening |         | Cancer treatment |         | Diabetes and complications |         | Asthma  |         | Urgent dental care |         | Rehabilitation |      | Palliative care |      |
|----------------------|-------------------------|---------|-----------------------------|---------|------------------|---------|------------------|---------|----------------------------|---------|---------|---------|--------------------|---------|----------------|------|-----------------|------|
|                      | 2020                    | 2021    | 2020                        | 2021    | 2020             | 2021    | 2020             | 2021    | 2020                       | 2021    | 2020    | 2021    | 2020               | 2021    | 2020           | 2021 | 2020            | 2021 |
| Not disrupted        | 52%                     | 31%     | 79%                         | 59%     | N/A              | 28%     | 59%              | 41%     | 45%                        | 34%     | 55%     | 41%     | 41%                | 38%     | 14%            | N/A  | 24%             | N/A  |
| Partially disrupted  | (15/29)                 | (9/29)  | (23/29)                     | (17/29) | N/A              | (8/29)  | 17/29)           | (12/29) | (13/29)                    | (10/29) | (16/29) | (12/29) | (12/29)            | (11/29) | (4/29)         | N/A  | (7/29)          | N/A  |
| Completely disrupted | 45%                     | 41%     | 17%                         | 17%     | N/A              | 41%     | 28%              | 34%     | 52%                        | 45%     | 28%     | 31%     | 41%                | 34%     | 38%            | N/A  | 34%             | N/A  |
| Don't know           | (13/29)                 | (12/29) | (5/29)                      | (5/29)  | N/A              | (12/29) | (8/29)           | (10/29) | (15/29)                    | (13/29) | (8/29)  | (9/29)  | (12/29)            | (10/29) | (11/29)        | N/A  | (10/29)         | N/A  |
| NA/NR                | 0%                      | 7%      | 0%                          | 0%      | N/A              | 10%     | 0%               | 0%      | 0%                         | 3%      | 0%      | 7%      | 7%                 | 3%      | 21%            | N/A  | 7%              | N/A  |
|                      | (0/29)                  | (2/29)  | (0/29)                      | (0/29)  | N/A              | (3/29)  | (0/29)           | (0/29)  | (0/29)                     | (1/29)  | (0/29)  | (2/29)  | (2/29)             | (1/29)  | (6/29)         | N/A  | (2/29)          | N/A  |
|                      | 0%                      | 21%     | 0%                          | 21%     | N/A              | 17%     | 10%              | 21%     | 0%                         | 17%     | 14%     | 21%     | 7%                 | 24%     | 24%            | N/A  | 31%             | N/A  |
|                      | (0/29)                  | (6/29)  | (0/29)                      | (6/29)  | N/A              | (5/29)  | (3/29)           | (6/29)  | (0/29)                     | (5/29)  | (4/29)  | (6/29)  | (2/29)             | (7/29)  | (7/29)         | N/A  | (9/29)          | N/A  |
|                      | 3%                      | 0%      | 3%                          | 3%      | N/A              | 3%      | 3%               | 3%      | 3%                         | 0%      | 3%      | 0%      | 3%                 | 0%      | 3%             | N/A  | 3%              | N/A  |
|                      | (1/29)                  | (0/29)  | (1/29)                      | (1/29)  | N/A              | (1/29)  | (1/29)           | (1/29)  | (1/29)                     | (0/29)  | (1/29)  | (0/29)  | (1/29)             | (0/29)  | (1/29)         | N/A  | (1/29)          | N/A  |

<sup>19</sup>Source: WHO NCD Country Capacity Survey, 2019-2021  
<sup>20</sup>N/A – not applicable, data for comparison not available between 2020 and 2021.  
<sup>21</sup>NR – no response

**Appendix 5.** Approaches employed to overcome NCD service disruptions due to COVID-19 Pandemic. Americas Region, 2020-2021.

| Approaches to overcome NCD service disruption                                       | Countries R2 (%)      | Same countries R1 and R2 (%) |                       |
|-------------------------------------------------------------------------------------|-----------------------|------------------------------|-----------------------|
|                                                                                     | 2021 (n=35 countries) | 2020 (n=29 countries)        | 2021 (n=29 countries) |
| Triaging to identify priorities                                                     | 75% (18/24)           | 74% (14/19)                  | 68% (13/19)           |
| Telemedicine deployment to replace in-person consults                               | 67% (16/24)           | 63% (12/19)                  | 63% (12/19)           |
| Redirection of patients to alternate care sites /reorientation of referral pathways | 67% (16/24)           | 47% (9/19)                   | 58% (11/19)           |
| Novel dispensing approaches for medicines                                           | 63% (15/24)           | 47% (9/19)                   | 58% (11/19)           |
| Task shifting / role delegation                                                     | 38% (9/24)            | 32% (6/19)                   | 42% (8/19)            |
| Other                                                                               | 8% (2/24)             | 5% (1/19)                    | 5% (1/19)             |
| Integration of several services into single visit                                   | 38% (9/24)            | N/A                          | N/A                   |
| Self-care interventions where appropriate                                           | 75% (18/24)           | N/A                          | N/A                   |
| Provision of home-based care where appropriate                                      | 75% (18/24)           | N/A                          | N/A                   |
| Catch-up campaigns for missed appointments                                          | 25% (6/24)            | N/A                          | N/A                   |
| Recruitment of additional staff                                                     | 67% (16/24)           | N/A                          | N/A                   |
| Expanding facility hours                                                            | 29% (7/24)            | N/A                          | N/A                   |
| Novel supply chain management and logistics approaches                              | 33% (8/24)            | N/A                          | N/A                   |
| Novel prescribing approaches (e.g. tele-prescription, extended drug prescriptions)  | 63% (15/24)           | N/A                          | N/A                   |
| Community communications                                                            | 75% (18/24)           | N/A                          | N/A                   |
| Government removal of user fees                                                     | 0% (0/24)             | N/A                          | N/A                   |

Source: WHO NCD Country Capacity Survey, 2019-2021

N/A – not applicable, data for comparison not available between 2020 and 2021.

NR – no response.
