# Supplementary material for: What is the NCD service capacity and disruptions due to COVID-19? Results from the WHO non-communicable disease country capacity survey in the Americas region
Source: PubMed Central journal article supplement — BMJ Open. 2023 Mar 2;13(3):e070085. doi: 10.1136/bmjopen-2022-070085 (PMC9990165; doi:10.1136/bmjopen-2022-070085), 2023-03-02
Supplement: bmjopen-2022-070085supp001.pdf [file bmjopen-2022-070085supp001.pdf]

## Supplemental material

|                                                                                                                                                                |   |
|----------------------------------------------------------------------------------------------------------------------------------------------------------------|---|
| <b>Appendix 1.</b> Countries of the Americas region included in the analysis.....                                                                              | 2 |
| <b>Appendix 2:</b> Availability of guidelines/protocols for the management of NCDs, referred by national NCD programs. Region of the Americas, 20019-2021..... | 3 |
| <b>Appendix 3.</b> Access to NCD services during the COVID-19 pandemic. Americas region, 2020-2021.....                                                        | 4 |
| <b>Appendix 4.</b> NCD service disruption due to COVID-19. Region of the Americas, 2021 results..                                                              | 5 |
| <b>Appendix 5.</b> Approaches employed to overcome NCD service disruptions due to COVID-19 Pandemic. Americas Region, 2020-2021.....                           | 6 |

**Appendix 1.** Countries of the Americas region included in the analysis

| Country                                             | Population (thousands) | Public health expenditure as % of GDP | NCD Mortality Rate (age-adjusted per 100 000 pop) |
|-----------------------------------------------------|------------------------|---------------------------------------|---------------------------------------------------|
| <b>Northern America</b>                             |                        |                                       |                                                   |
| Canada                                              | 38,067.90              | 7.9                                   | 302                                               |
| United States of America                            | 332,915.10             | 8.5                                   | 408                                               |
| <b>Mexico, Central America, and Latin Caribbean</b> |                        |                                       |                                                   |
| Belize                                              | 404.9                  | 3.9                                   | 452                                               |
| Costa Rica                                          | 5,139.10               | 5.5                                   | 310                                               |
| Cuba                                                | 11,317.50              | 9.9                                   | 431                                               |
| Dominican Republic                                  | 10,953.70              | 2.5                                   | 508                                               |
| El Salvador                                         | 6,518.50               | 4.5                                   | 393                                               |
| Guatemala                                           | 18,249.90              | 2.1                                   | 498                                               |
| Honduras                                            | 10,063.00              | 2.8                                   | 615                                               |
| Mexico                                              | 130,262.20             | 2.7                                   | 466                                               |
| Nicaragua                                           | 6,702.40               | 5.1                                   | 548                                               |
| Panama                                              | 4,381.60               | 4.6                                   | 335                                               |
| <b>South America</b>                                |                        |                                       |                                                   |
| Argentina                                           | 45,605.80              | 5.9                                   | 436                                               |
| Bolivia                                             | 11,832.90              | 4.5                                   | 584                                               |
| Brazil                                              | 213,993.40             | 4                                     | 425                                               |
| Chile                                               | 19,212.40              | 4.6                                   | 329                                               |
| Colombia                                            | 51,265.80              | 5.5                                   | 327                                               |
| Ecuador                                             | 17,888.50              | 4.2                                   | 365                                               |
| Peru                                                | 33,359.40              | 3.3                                   | 304                                               |
| Paraguay                                            | 7,219.60               | 2.9                                   | 448                                               |
| Uruguay                                             | 3,485.20               | 6.7                                   | 446                                               |
| Venezuela                                           | 28,704.90              | 1.7                                   | 412                                               |
| <b>Non-Latin Caribbean</b>                          |                        |                                       |                                                   |
| Antigua and Barbuda                                 | 98.70                  | 2.9                                   | 502                                               |
| Bahamas                                             | 396.90                 | 3.1                                   | 533                                               |
| Barbados                                            | 287.70                 | 2.9                                   | 477                                               |
| Dominica                                            | 74.30                  | 4.3                                   | .                                                 |
| Grenada                                             | 113.00                 | 1.7                                   | 619                                               |
| Guyana                                              | 790.30                 | 3.7                                   | 802                                               |
| Haiti                                               | 11,541.70              | 0.9                                   | 839                                               |
| Jamaica                                             | 2,973.50               | 3.9                                   | 455                                               |
| Saint Kitts and Nevis                               | 54.20                  | 2.5                                   | .                                                 |
| Saint Lucia                                         | 184.40                 | 2.1                                   | 516                                               |
| Saint Vincent and the Grenadines                    | 111.30                 | 3.1                                   | 537                                               |
| Suriname                                            | 591.80                 | 5.3                                   | 666                                               |
| Trinidad and Tobago                                 | 1,403.40               | 3.4                                   | 439                                               |

Source: PAHO Core Indicators, 2022

**Appendix 2:** Availability of guidelines/protocols for the management of NCDs, referred by national NCD programs. Region of the Americas, 20019-2021

| NCD guidelines/protocols                           | Hypertension |      | Diabetes |      | Cancer |      | Chronic respiratory |      | NCD4 Guidelines/protocols |      |
|----------------------------------------------------|--------------|------|----------|------|--------|------|---------------------|------|---------------------------|------|
|                                                    | 2019         | 2021 | 2019     | 2021 | 2019   | 2021 | 2019                | 2021 | 2019                      | 2021 |
| Availability                                       | 86%          | 89%  | 97%      | 97%  | 77%    | 89%  | 66%                 | 71%  | 54%                       | 63%  |
| Utilized in at least 50% of health care facilities | 73%          | 69%  | 74%      | 74%  | 70%    | 60%  | 74%                 | 51%  | 34%                       | 40%  |
| Last time updated                                  |              |      |          |      |        |      |                     |      |                           |      |
| last 5 years                                       | 23%          | 46%  | 46%      | 63%  | 26%    | 31%  | 14%                 | 17%  | .                         | .    |
| 6 to 10 years                                      | 40%          | 26%  | 23%      | 11%  | 34%    | 29%  | 23%                 | 23%  | .                         | .    |
| >10 years                                          | 20%          | 11%  | 23%      | 14%  | 14%    | 23%  | 20%                 | 26%  | .                         | .    |
| Includes referral criteria                         | 77%          | 77%  | 82%      | 89%  | 85%    | 80%  | 78%                 | 60%  | 37%                       | 49%  |

Source: WHO NCD Country Capacity Survey, 2019-2021.

**Appendix 3.** Access to NCD services during the COVID-19 pandemic. Americas region, 2020-2021

| NCD services               | Countries R2 (%)         | Same countries R1 and R2 (%) |                          |
|----------------------------|--------------------------|------------------------------|--------------------------|
|                            | 2021<br>(n=35 countries) | 2020<br>(n=29 countries)     | 2021<br>(n=29 countries) |
| Outpatient NCD services    |                          |                              |                          |
| Functioning as normal      | 34% (12/35)              | 24% (7/29)                   | 34% (10/29)              |
| Limited access             | 54% (19/35)              | 66% (19/29)                  | 52% (15/29)              |
| Suspended                  | 3% (1/35)                | 7% (2/29)                    | 3% (1/29)                |
| Don't know                 | 6% (2/35)                | 0% (2/29)                    | 7% (2/29)                |
| Not applicable/No response | 3% (1/35)                | 3% (1/29)                    | 3% (1/29)                |
| Inpatient NCD services     |                          |                              |                          |
| Functioning as normal      | 40% (14/35)              | 52% (15/29)                  | 41% (12/29)              |
| Limited access             | 54% (19/35)              | 38% (11/29)                  | 52% (15/29)              |
| Suspended                  | 0% (2/35)                | 0% (0/29)                    | 0% (0/29)                |
| Don't know                 | 6% (2/35)                | 7% (2/29)                    | 7% (2/29)                |
| Not applicable/No response | 0% (2/35)                | 3% (1/29)                    | 0% (2/29)                |
| Community-based NCD care   |                          |                              |                          |
| Functioning as normal      | 37% (13/35)              | N/A                          | 41% (12/29)              |
| Limited access             | 43% (15/35)              | N/A                          | 41% (12/29)              |
| Suspended                  | 11% (4/35)               | N/A                          | 10% (3/29)               |
| Don't know                 | 6% (2/35)                | N/A                          | 7% (2/29)                |
| Not applicable/No response | 3% (1/35)                | N/A                          | 0% (2/29)                |
| Mobile NCD clinics         |                          |                              |                          |
| Functioning as normal      | 11% (4/35)               | N/A                          | 10% (3/29)               |
| Limited access             | 23% (8/35)               | N/A                          | 17% (5/29)               |
| Suspended                  | 17% (6/35)               | N/A                          | 21% (6/29)               |
| Don't know                 | 14% (5/35)               | N/A                          | 14% (4/29)               |
| Not applicable/No response | 34% (12/35)              | N/A                          | 38% (11/29)              |

Source: WHO NCD Country Capacity Survey, 2019-2021

Note: Round 1 (R1) conducted in 2020 and Round 2 (R2) conducted in 2021.

N/A – not applicable, data for comparison not available between 2020 and 2021.

**Appendix 4.** NCD service disruption due to COVID-19. Region of the Americas, 2021 results.

| Disruption level     | Hypertension management |                | Cardio-vascular emergencies |                | Cancer screening |                | Cancer treatment |                | Diabetes and complications |                | Asthma         |                | Urgent dental care |                | Rehabilitation |      | Palliative care |      |
|----------------------|-------------------------|----------------|-----------------------------|----------------|------------------|----------------|------------------|----------------|----------------------------|----------------|----------------|----------------|--------------------|----------------|----------------|------|-----------------|------|
|                      | 2020                    | 2021           | 2020                        | 2021           | 2020             | 2021           | 2020             | 2021           | 2020                       | 2021           | 2020           | 2021           | 2020               | 2021           | 2020           | 2021 | 2020            | 2021 |
| Not disrupted        | 52%<br>(15/29)          | 31%<br>(9/29)  | 79%<br>(23/29)              | 59%<br>(17/29) | N/A              | 28%<br>(8/29)  | 59%<br>(17/29)   | 41%<br>(12/29) | 45%<br>(13/29)             | 34%<br>(10/29) | 55%<br>(16/29) | 41%<br>(12/29) | 41%<br>(12/29)     | 38%<br>(11/29) | 14%<br>(4/29)  | N/A  | 24%<br>(7/29)   | N/A  |
| Partially disrupted  | 45%<br>(13/29)          | 41%<br>(12/29) | 17%<br>(5/29)               | 17%<br>(5/29)  | N/A              | 41%<br>(12/29) | 28%<br>(8/29)    | 34%<br>(10/29) | 52%<br>(15/29)             | 45%<br>(13/29) | 28%<br>(8/29)  | 31%<br>(9/29)  | 41%<br>(12/29)     | 34%<br>(10/29) | 38%<br>(11/29) | N/A  | 34%<br>(10/29)  | N/A  |
| Completely disrupted | 0%<br>(0/29)            | 7%<br>(2/29)   | 0%<br>(0/29)                | 0%<br>(0/29)   | N/A              | 10%<br>(3/29)  | 0%<br>(0/29)     | 0%<br>(0/29)   | 0%<br>(0/29)               | 3%<br>(1/29)   | 0%<br>(0/29)   | 7%<br>(2/29)   | 7%<br>(2/29)       | 3%<br>(1/29)   | 21%<br>(6/29)  | N/A  | 7%<br>(2/29)    | N/A  |
| Don't know           | 0%<br>(0/29)            | 21%<br>(6/29)  | 0%<br>(0/29)                | 21%<br>(6/29)  | N/A              | 17%<br>(5/29)  | 10%<br>(3/29)    | 21%<br>(6/29)  | 0%<br>(0/29)               | 17%<br>(5/29)  | 14%<br>(4/29)  | 21%<br>(6/29)  | 7%<br>(2/29)       | 24%<br>(7/29)  | 24%<br>(7/29)  | N/A  | 31%<br>(9/29)   | N/A  |
| NA/NR                | 3%<br>(1/29)            | 0%<br>(0/29)   | 3%<br>(1/29)                | 3%<br>(1/29)   | N/A              | 3%<br>(1/29)   | 3%<br>(1/29)     | 3%<br>(1/29)   | 3%<br>(1/29)               | 0%<br>(0/29)   | 3%<br>(1/29)   | 0%<br>(0/29)   | 3%<br>(1/29)       | 0%<br>(0/29)   | 3%<br>(1/29)   | N/A  | 3%<br>(1/29)    | N/A  |

Source: WHO NCD Country Capacity Survey, 2019-2021

N/A – not applicable, data for comparison not available between 2020 and 2021.

NR – no response

**Appendix 5.** Approaches employed to overcome NCD service disruptions due to COVID-19 Pandemic. Americas Region, 2020-2021.

| Approaches to overcome NCD service disruption                                       | Countries R2 (%)      | Same countries R1 and R2 (%) |                       |
|-------------------------------------------------------------------------------------|-----------------------|------------------------------|-----------------------|
|                                                                                     | 2021 (n=35 countries) | 2020 (n=29 countries)        | 2021 (n=29 countries) |
| Triaging to identify priorities                                                     | 75% (18/24)           | 74% (14/19)                  | 68% (13/19)           |
| Telemedicine deployment to replace in-person consults                               | 67% (16/24)           | 63% (12/19)                  | 63% (12/19)           |
| Redirection of patients to alternate care sites /reorientation of referral pathways | 67% (16/24)           | 47% (9/19)                   | 58% (11/19)           |
| Novel dispensing approaches for medicines                                           | 63% (15/24)           | 47% (9/19)                   | 58% (11/19)           |
| Task shifting / role delegation                                                     | 38% (9/24)            | 32% (6/19)                   | 42% (8/19)            |
| Other                                                                               | 8% (2/24)             | 5% (1/19)                    | 5% (1/19)             |
| Integration of several services into single visit                                   | 38% (9/24)            | N/A                          | N/A                   |
| Self-care interventions where appropriate                                           | 75% (18/24)           | N/A                          | N/A                   |
| Provision of home-based care where appropriate                                      | 75% (18/24)           | N/A                          | N/A                   |
| Catch-up campaigns for missed appointments                                          | 25% (6/24)            | N/A                          | N/A                   |
| Recruitment of additional staff                                                     | 67% (16/24)           | N/A                          | N/A                   |
| Expanding facility hours                                                            | 29% (7/24)            | N/A                          | N/A                   |
| Novel supply chain management and logistics approaches                              | 33% (8/24)            | N/A                          | N/A                   |
| Novel prescribing approaches (e.g. tele-prescription, extended drug prescriptions)  | 63% (15/24)           | N/A                          | N/A                   |
| Community communications                                                            | 75% (18/24)           | N/A                          | N/A                   |
| Government removal of user fees                                                     | 0% (0/24)             | N/A                          | N/A                   |

Source: WHO NCD Country Capacity Survey, 2019-2021

N/A – not applicable, data for comparison not available between 2020 and 2021.

NR – no response.
